# Supplementary material for: Single-atom Pt in intermetallics as an ultrastable and selective catalyst for propane dehydrogenation
Source: PubMed Central journal article supplement (PMC7275083; doi:10.1038/s41467-020-16693-9), 2020-06-05
Supplement: 41467_2020_16693_MOESM1_ESM.pdf [file 41467_2020_16693_MOESM1_ESM.pdf]

## Supplementary Information

# **Single-atom Pt in intermetallics as an ultrastable and selective catalyst for propane dehydrogenation**

Nakaya *et al.*

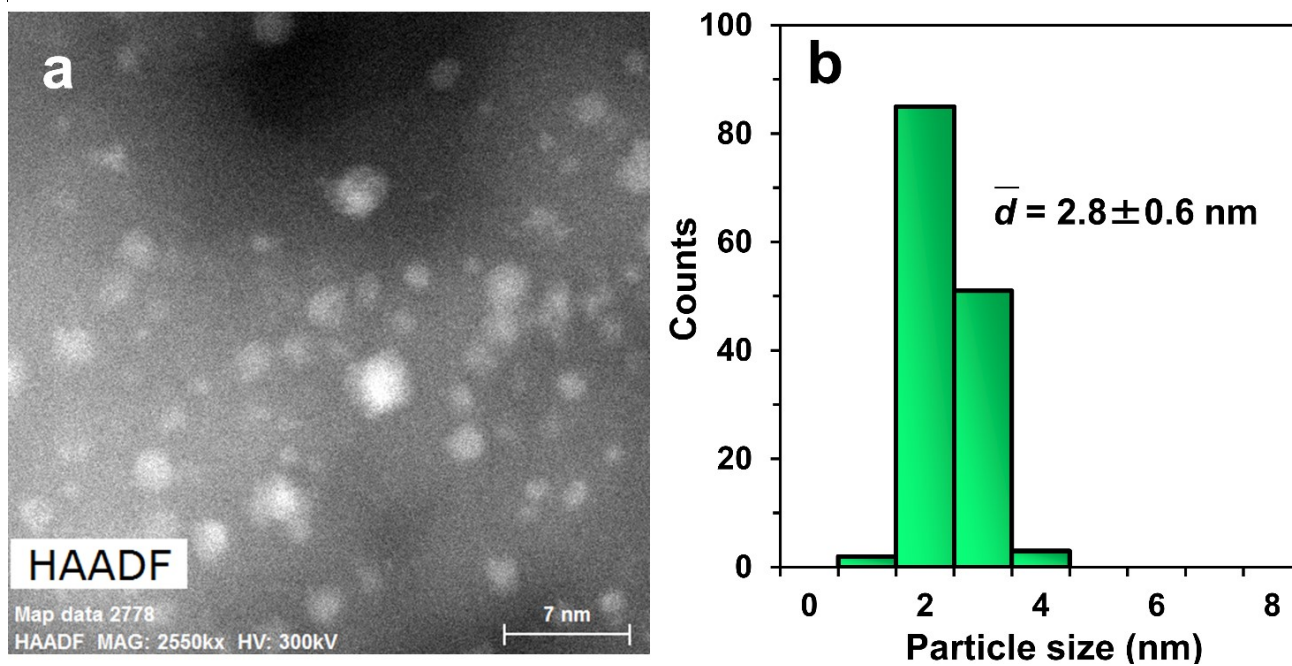

**Supplementary Figure 1.** **a** High angle annular dark field scanning transmission electron microscopy (HAADF-STEM) image of PtGa-Pb/SiO<sub>2</sub> (Pt/Pb = 2) and **b** the size distribution of nanoparticles. The particle size distribution was narrow with small and uniform nanoparticles. The particle sizes ranged from 1 nm to 4 nm with a volume weighted average of  $2.8 \pm 0.6$  nm.

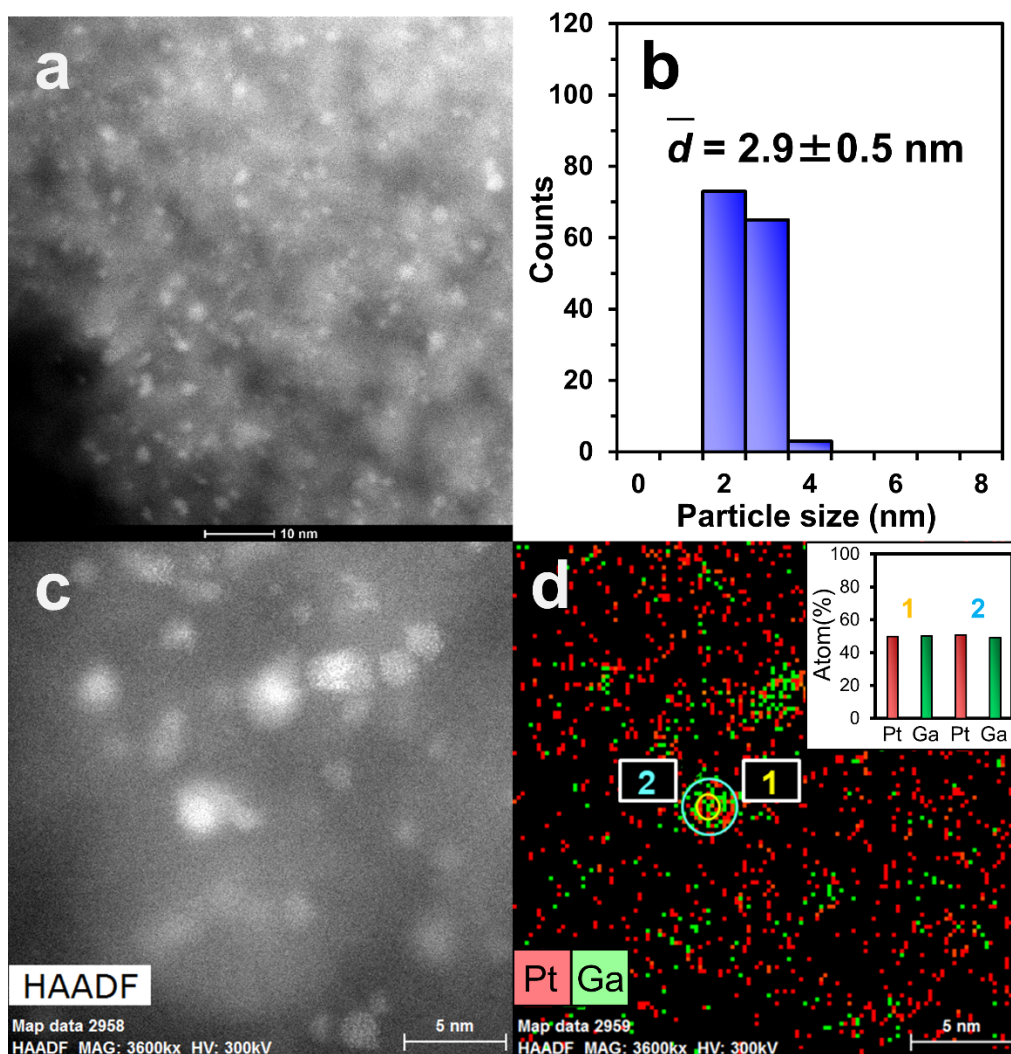

**Supplementary Figure 2.** **a** HAADF-STEM image of PtGa/SiO<sub>2</sub> and **b** the size distribution of nanoparticles. **c** HAADF-STEM image of PtGa/SiO<sub>2</sub> and **d** the corresponding elemental map of the Pt + Ga overlayer obtained using energy-dispersive X-ray (EDX) analyzer. Enclosed areas with a yellow and blue circles are correspond to area 1 (core of the nanoparticle) and area 2 (overall of the nanoparticle), respectively.

**Supplementary Note 1.** Structural analysis of PtGa/SiO<sub>2</sub>: Supplementary Figures 2a and b show the HAADF-STEM image of PtGa/SiO<sub>2</sub> and the particle size distribution, respectively. The particle sizes ranged from 1 nm to 4 nm with a volume weighted average of  $2.9 \pm 0.5 \text{ nm}$ . Supplementary Figures 2c and d shows the narrow HAADF-STEM image of PtGa/SiO<sub>2</sub> and the elemental maps of Pt + Ga overlayer acquired using EDX analysis, respectively. The atomic ratios of Pt/Ga in a nanoparticle were 1.0 in both of Area 1 (core) and Area 2 (overall), that consist with the identical ratio of intermetallic PtGa.

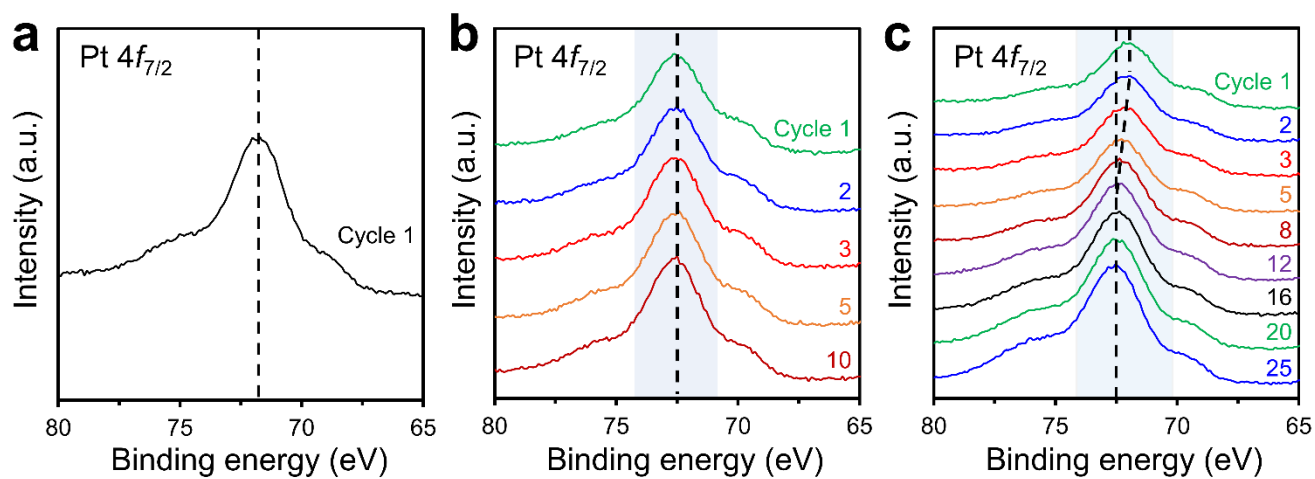

**Supplementary Figure 3.** Binding energy of Pt 4f<sub>7/2</sub> electrons obtained by X-ray photoelectron spectroscopy (XPS); **a** Pt/SiO<sub>2</sub>, **b** PtGa/SiO<sub>2</sub>, and **c** PtGa-Pb/SiO<sub>2</sub> (Pt/Pb = 2). The surface of the sample was sputtered by Ar<sup>+</sup> ion (voltage: 400V, rate: 20%, time: 1 s) at each cycle.

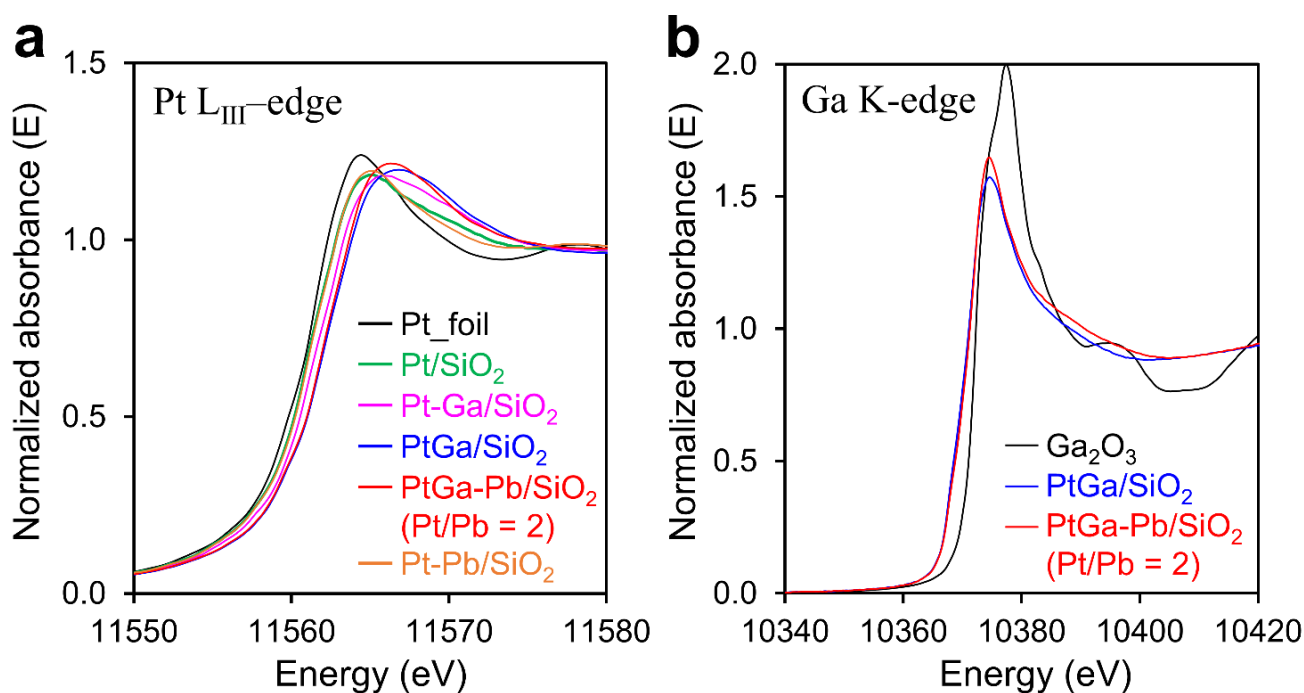

**Supplementary Figure 4.** **a** Pt L<sub>III</sub>- and **b** Ga K-edge X-ray absorption near edge structure (XANES) spectra of the reduced catalysts and reference compounds. The atomic ratio of Pt/M in Pt-M/SiO<sub>2</sub> (M = Ga and Pb) was 3.

**Supplementary Note 2.** XANES spectra of the catalysts: the Pt L<sub>III</sub> absorption edges and white line heights of Pt-Ga/SiO<sub>2</sub> (Pt/Ga = 3) and PtGa/SiO<sub>2</sub> were, respectively, shifted to higher energy and slightly increased compared with those of Pt/SiO<sub>2</sub>, indicating that the electron density of Pt decreased upon alloying with Ga. This is consistent with the result of the comprehensive XANES and DFT studies for intermetallic PtGa<sub>2</sub>.<sup>1</sup> On the contrary, for PtGa-Pb/SiO<sub>2</sub> (Pt/Pb = 2), the absorption edge was slightly shifted to lower energy compared with PtGa/SiO<sub>2</sub>, indicating that the electron density of Pt metal increased by Pb modification (Fig. 2). Similar electron donation by Pb was also reported for other Pt-Pb bimetallic systems.<sup>2</sup> For the Ga K-edge XANES spectra, the adsorption edges of PtGa and PtGa-Pb were much lower in energy than that of Ga<sub>2</sub>O<sub>3</sub>, indicating the presence of metallic Ga. However, the white line intensities of them were somewhat high, which suggests that a part of Ga is oxidized. According to the literature by Copéret *et al.* showing that Ga in Pt-Ga was completely reduced under flowing H<sub>2</sub> at 550°C,<sup>3</sup> the presence of oxidized Ga might be attributed to aerobic oxidation of a part of surface Ga by sub-ppm-level contaminated oxygen in the grove box during sample preparation. This is consistent with the high oxophilic character of Ga.<sup>4,5</sup>

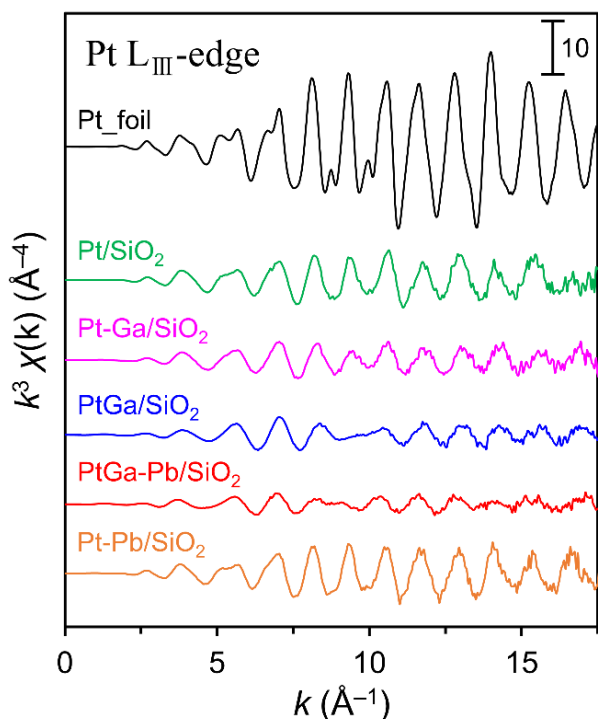

**Supplementary Figure 5.** Pt L<sub>III</sub>-edge  $k^3$ -weighted raw extended X-ray absorption fine structure (EXAFS) oscillations for silica-supported Pt-based catalysts and Pt foil: Pt foil (Black), Pt/SiO<sub>2</sub> (Green), Pt-Ga/SiO<sub>2</sub> (Pt/Ga = 3) (Pink), PtGa/SiO<sub>2</sub> (Blue), PtGa-Pb/SiO<sub>2</sub> (Pt/Pb = 2) (Red), Pt-Pb/SiO<sub>2</sub> (Pt/Pb = 3) (Orange).

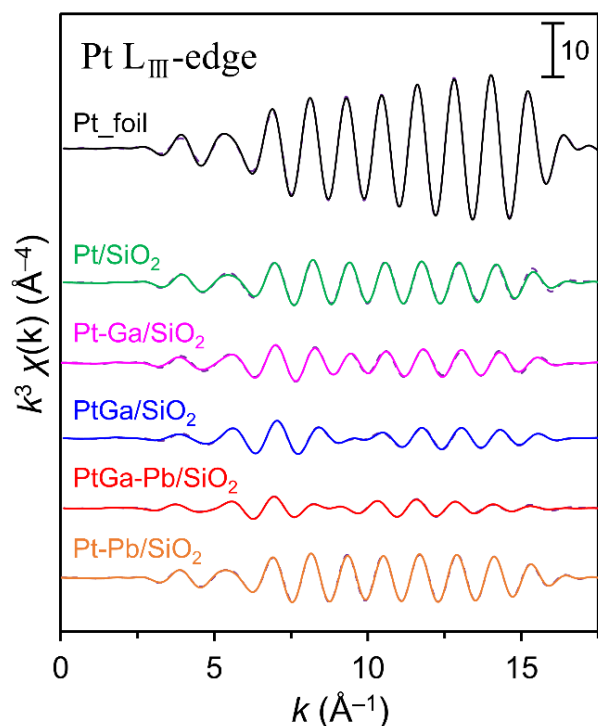

**Supplementary Figure 6.** Curve-fitting results of Pt L<sub>III</sub>-edge  $k^3$ -weighted EXAFS for silica-supported Pt-based catalysts and Pt foil: Pt foil (Black), Pt/SiO<sub>2</sub> (Green), Pt-Ga/SiO<sub>2</sub> (Pt/Ga = 3) (Pink), PtGa/SiO<sub>2</sub> (Blue), PtGa-Pb/SiO<sub>2</sub> (Pt/Pb = 2) (Red), Pt-Pb/SiO<sub>2</sub> (Pt/Pb = 3) (Orange). Solid and dashed lines indicate the results of simulation and experiment, respectively.

**Supplementary Table 1.** Summary of the Pt L<sub>III</sub>-edge  $k^3$ -weighted EXAFS curve fitting for Pt-based catalysts and reference Pt foil.

| Sample                             | Shell | $S_o^{2[a]}$ | $CN^{[b]}$    | $R$ (Å) <sup>[c]</sup> | $\Delta E_o$ (eV) <sup>[d]</sup> | $\sigma^2$ (Å <sup>2</sup> ) <sup>[e]</sup> | R-factor ( $R^2$ ) |
|------------------------------------|-------|--------------|---------------|------------------------|----------------------------------|---------------------------------------------|--------------------|
| Pt_foil                            | Pt–Pt | 0.91         | 12.0 (fix)    | $2.77 \pm 0.00$        | $4.8 \pm 0.4$                    | $0.005 \pm 0.000$                           | 0.002              |
| Pt/SiO <sub>2</sub>                | Pt–Pt | 0.91         | $7.0 \pm 0.4$ | $2.73 \pm 0.00$        | $3.9 \pm 0.7$                    | $0.007 \pm 0.000$                           | 0.009              |
| Pt-Ga/SiO <sub>2</sub>             | Pt–Ga | 0.91         | $1.6 \pm 1.1$ | $2.50 \pm 0.01$        |                                  | $0.013 \pm 0.005$                           |                    |
| (Pt/Ga = 3)                        | Pt–Pt | 0.91         | $5.2 \pm 0.8$ | $2.71 \pm 0.01$        | $-1.9 \pm 1.3$                   | $0.008 \pm 0.001$                           | 0.015              |
| PtGa/SiO <sub>2</sub>              | Pt–Ga | 0.91         | $2.6 \pm 0.5$ | $2.49 \pm 0.01$        |                                  | $0.011 \pm 0.001$                           |                    |
|                                    | Pt–Pt | 0.91         | $2.7 \pm 0.4$ | $2.70 \pm 0.01$        | $-4.4 \pm 1.1$                   | $0.007 \pm 0.001$                           | 0.010              |
| PtGa-Pb/SiO <sub>2</sub>           | Pt–Ga | 0.91         | $1.8 \pm 0.3$ | $2.50 \pm 0.01$        |                                  | $0.010 \pm 0.001$                           |                    |
|                                    | Pt–Pt | 0.91         | $4.5 \pm 1.3$ | $2.75 \pm 0.01$        | $-1.7 \pm 2.0$                   | $0.010 \pm 0.001$                           | 0.007              |
|                                    | Pt–Pb | 0.91         | $1.0 \pm 1.0$ | $2.88 \pm 0.03$        |                                  | $0.012 \pm 0.006$                           |                    |
| Pt-Pb/SiO <sub>2</sub> (Pt/Pb = 3) | Pt–Pt | 0.91         | $7.5 \pm 0.3$ | $2.74 \pm 0.01$        | $2.3 \pm 0.5$                    | $0.007 \pm 0.000$                           | 0.004              |

<sup>[a]</sup> Amplitude factor. <sup>[b]</sup> Coordination number. <sup>[c]</sup> Distance between absorber and backscatterer atoms. <sup>[d]</sup> Correction term in the absorption edge. <sup>[e]</sup> Disorder term (EXAFS Debye–Waller factor).

**Supplementary Note 3.** EXAFS curve fitting for Pt-based catalysts: PtGa/SiO<sub>2</sub> showed Pt–Ga and Pt–Pt scatterings at 2.49 Å (CN = 2.6) and 2.70 Å (CN = 2.7), respectively. The Pt–Ga scattering at 2.49 Å, which originated from intermetallic PtGa, indicated the formation of intermetallic PtGa compounds. PtGa-Pb/SiO<sub>2</sub> showed Pt–Ga, Pt–Pt, and Pt–Pb scatterings at 2.50 Å (CN = 1.8), 2.75 Å (CN = 4.5), and 2.88 Å (CN = 1.0), respectively (Supplementary Table 1). The Pt–Ga scattering at 2.50 Å, which originated from intermetallic PtGa, indicated the formation of intermetallic PtGa compounds. The small contribution of Pt–Pb scattering (CN = 1.0) was observed, which indicates the presence of Pb atoms with close contact to Pt. Pt-Ga/SiO<sub>2</sub> (Pt/Ga = 3) showed Pt–Ga and Pt–Pt scatterings at 2.50 Å (CN = 1.6) and 2.71 Å (CN = 5.2), respectively. The Pt–Ga scattering at 2.49 Å, which originated from intermetallic PtGa, indicated the formation of intermetallic PtGa compounds. Considering that the higher Pt–Pt scattering and diffraction angles (Supplementary Figure 16), which consistent with those of monometallic Pt, Pt-Ga/SiO<sub>2</sub> (Pt/Ga = 3) likely has Pt-PtGa core-shell structure.

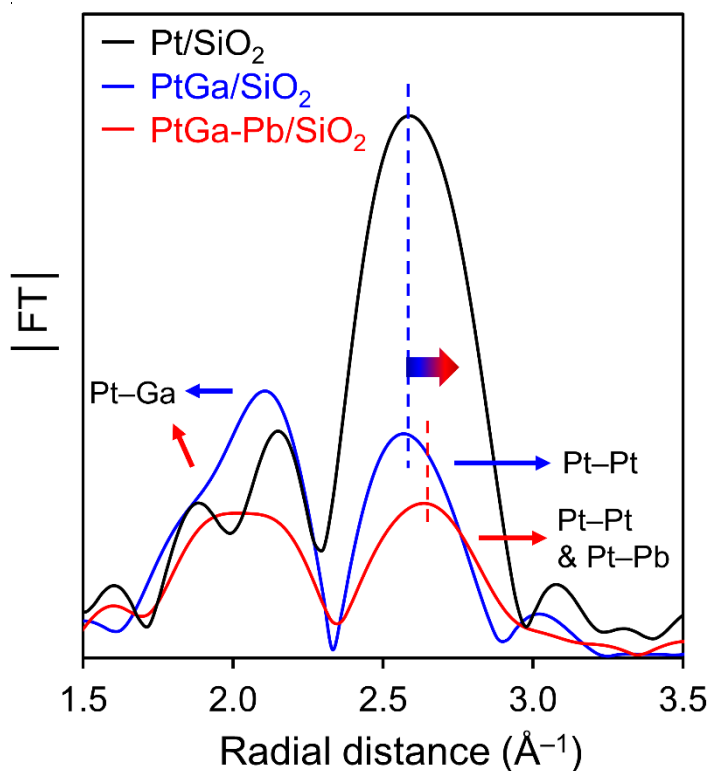

**Supplementary Figure 7.** Magnitude of Fourier transform of the  $k^3$ -weighted EXAFS spectra of reduced catalysts.  $\Delta k = 3\text{--}16 \text{ \AA}$ .

**Supplementary Table 2.** Pt dispersions of silica-supported Pt-based catalysts.<sup>[a]</sup>

| Catalyst              | Dispersion of Pt (%) |
|-----------------------|----------------------|
| Pt                    | 37.1                 |
| Pt-Ga (Pt/Ga = 3)     | 24.9                 |
| PtGa                  | 9.9                  |
| Pt <sub>3</sub> Sn    | 24.2                 |
| PtSn                  | 8.0                  |
| Pt <sub>3</sub> In    | 20.2                 |
| Pt-Pb (Pt/Pb = 3)     | 17.5                 |
| PtGa-Pb (Pt/Pb = 5)   | 8.5                  |
| PtGa-Pb (Pt/Pb = 2.5) | 4.6                  |
| PtGa-Pb (Pt/Pb = 2)   | 5.9                  |
| PtGa-Pb (Pt/Pb = 1.5) | 2.5                  |
| PtGa-Sn (Pt/Sn = 2)   | 9.8                  |
| PtGa-In (Pt/In = 2)   | 6.4                  |

<sup>[a]</sup> The loading amount of Pt is fixed at 3 wt% for all the catalysts.



**a** PtGa-Pt<sub>3</sub> site (*t*)      **b** PtGa-Pt<sub>1</sub> site (*t*)      **c** (PtGa + Pb)-Pt<sub>1</sub>      **d** PtGa-Pt<sub>3</sub> site (*h*)

Site (*t*)

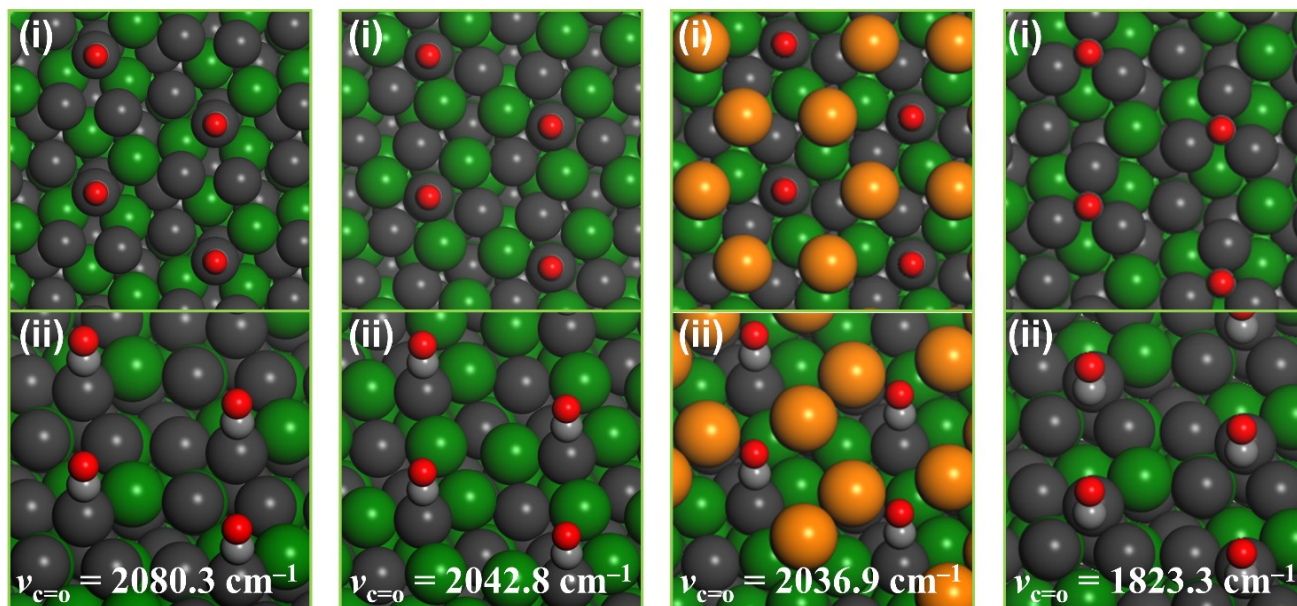

**Supplementary Figure 8.** Optimized structures of CO adsorbed on **a** PtGa-Pt<sub>3</sub> (*t*), **b** PtGa-Pt<sub>1</sub> (*t*), **c** (PtGa + Pb)-Pt<sub>1</sub> (*t*), and **d** PtGa-Pt<sub>3</sub> (*h*). Adsorption geometries of on-top and three-fold hollow CO were abbreviated as (*t*) and (*h*), respectively. (i) Upper and (ii) lower figures indicate top and diagonal views, respectively. Black: Pt, green: Ga, orange: Pb, gray: C, red: O.

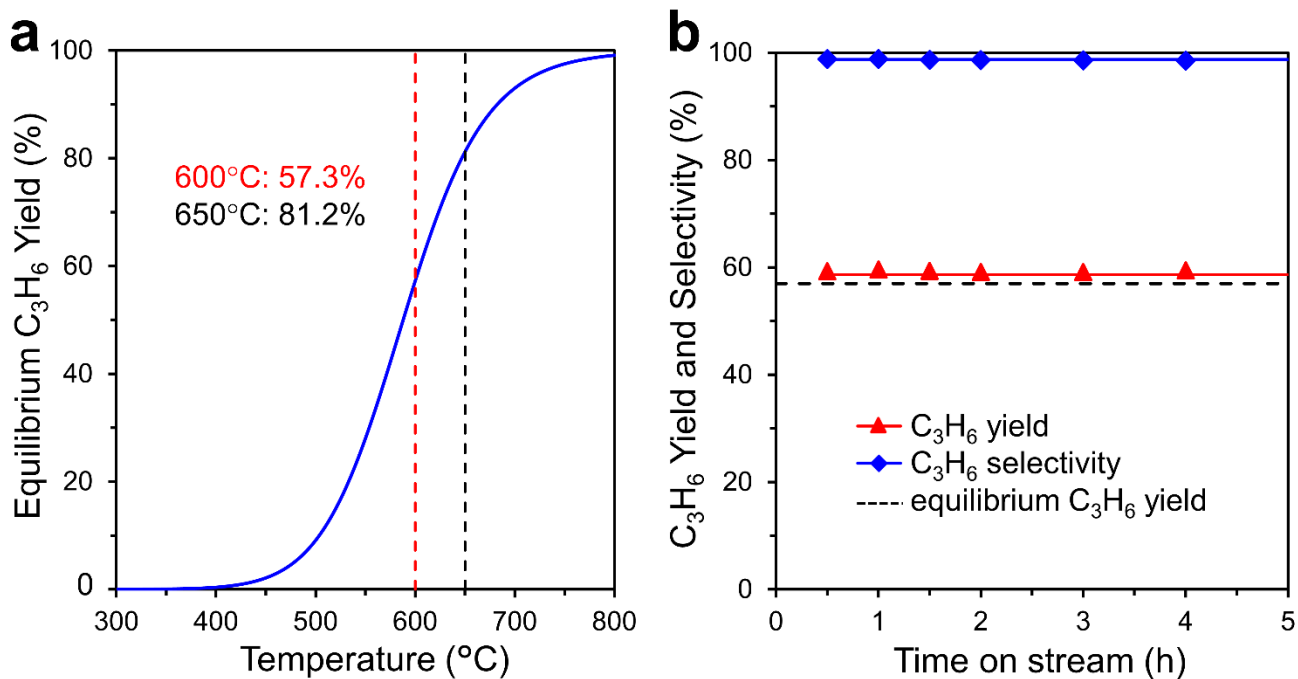

**Supplementary Figure 9.** **a** Simulated (600 and 650°C) and **b** experimental (600°C) equilibrium C<sub>3</sub>H<sub>6</sub> yield in the reaction condition used in this study. Good agreement was obtained between the simulation and experiment. Excess amount of PtGa-Pb/SiO<sub>2</sub> (150 mg) was used so that C<sub>3</sub>H<sub>6</sub> yield reaches equilibrium.

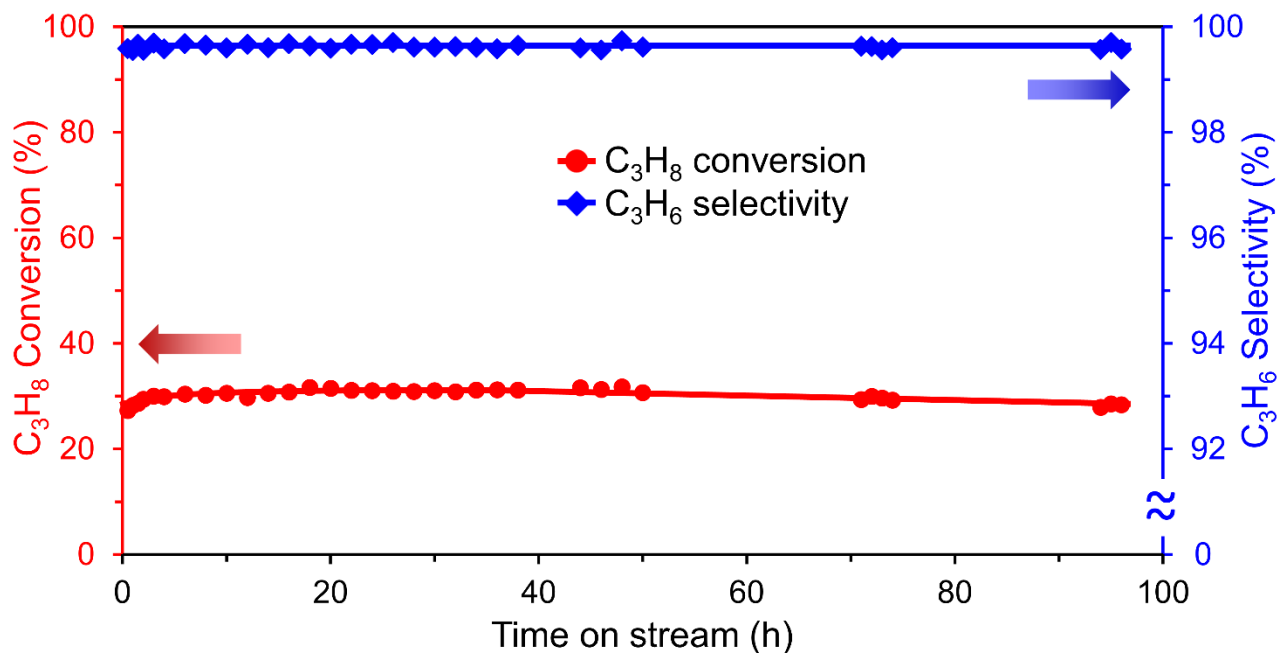

**Supplementary Figure 10.** Long-term stability test in PDH on PtGa-Pb/SiO<sub>2</sub> (Pt/Pb = 2) at 600°C.

**Supplementary Note 4.** First-order deactivation model:

The first-order deactivation model was used to estimate the catalytic stability.<sup>6</sup>  $k_d$  ( $\text{h}^{-1}$ ) and  $\tau$  (h) were defined by the following equation. Here, lower  $k_d$  and higher  $\tau$  values are indicative of higher stability.

$$k_d = \frac{\ln\left(\frac{1 - \text{conv.}_{end}}{\text{conv.}_{end}}\right) - \ln\left(\frac{1 - \text{conv.}_{start}}{\text{conv.}_{start}}\right)}{t} \quad (1)$$

$$\tau = \frac{1}{k_d} \quad (2)$$

where,  $\text{conv.}_{start}$  and  $\text{conv.}_{end}$  indicates initial and final propane conversion, respectively.  $t$  represents the reaction time.  $k_d$  ( $\text{h}^{-1}$ )<sup>6</sup> and  $\tau$  (h) represent the deactivation rate constant and expected catalyst life, respectively.

**Supplementary Table 3.** Summary of the catalytic data of PtGa-Pb and other reported Pt-based catalysts for PDH.

| entry | catalyst                                           | Pt<br>(wt%) | temp.<br>(°C) | conversion<br>(%) <sup>[a]</sup> | C <sub>3</sub> H <sub>6</sub> Selectivity<br>(%) <sup>[b]</sup> | specific<br>activity (s <sup>-1</sup> ) <sup>[c]</sup> | k <sub>d</sub><br>(h <sup>-1</sup> ) <sup>[d]</sup> | ref   |
|-------|----------------------------------------------------|-------------|---------------|----------------------------------|-----------------------------------------------------------------|--------------------------------------------------------|-----------------------------------------------------|-------|
| 1     | PtIn/Mg(Al)O-600                                   | 0.6         | 620           | 69–50                            | 98                                                              | 0.45                                                   | 0.027                                               | 7     |
| 2     | PtIn/Mg(Al)O-x                                     | 0.6         | 620           | 66.4–43.5                        | 95                                                              | 0.43                                                   | 0.118                                               | 8     |
| 3     | 0.3PtSn/1.5In-Al                                   | 0.3         | 620           | 58.4–48.6                        | 93.5                                                            | 0.75                                                   | 0.144                                               | 9     |
| 4     | PtGa/SiO <sub>2</sub>                              | 3           | 600           | 44.7–24.5                        | 98.8                                                            | 0.56                                                   | 0.018                                               | This  |
| 5     | PtGa-Pb/SiO <sub>2</sub> (Pt/Pb = 2)               | 3           | 600           | 30.0 (4 h)–28.4                  | 99.6                                                            | 0.38                                                   | 0.001                                               | Study |
| 6     | Pt/Mg(Sn)(Al)O                                     | 0.5         | 600           | 48.3–43.0                        | 86.4                                                            | 1.05                                                   | 0.002                                               | 10    |
| 7     | Pt <sub>3</sub> In/SiO <sub>2</sub>                | 0.3         | 600           | 17.5–17                          | 92                                                              | 0.08                                                   | 0.018                                               | 11    |
| 8     | Pt <sub>3</sub> Ga/CeAl                            | 1           | 600           | 41.1–32.2                        | 99.6                                                            | 0.52                                                   | 0.026                                               | 12    |
| 9     | Pt <sub>3</sub> Ga/Al <sub>2</sub> O <sub>3</sub>  | 1           | 600           | 39.4–28.1                        | 99.5                                                            | 0.50                                                   | 0.034                                               | 12    |
| 10    | Pt/CeAl                                            | 1           | 600           | 47.1–22.2                        | 62                                                              | 0.59                                                   | 0.076                                               | 12    |
| 11    | PtSn/TS-1                                          | 0.5         | 600           | 53.5–47.7                        | 92.5                                                            | 0.41                                                   | 0.033                                               | 13    |
| 12    | 15%Zn-0.1%/Al <sub>2</sub> O <sub>3</sub>          | –           | 600           | 35–31                            | 94                                                              | –                                                      | 0.045                                               | 14    |
| 13    | Pt/TA0                                             | 1           | 600           | 50.5–21.0                        | 60                                                              | 0.64                                                   | 0.134                                               | 15    |
| 14    | Pt/TA10                                            | 1           | 600           | 47.3–25.9                        | 77                                                              | 0.60                                                   | 0.094                                               | 15    |
| 15    | Pt/TA20                                            | 1           | 600           | 45.5–17.8                        | 89                                                              | 0.57                                                   | 0.135                                               | 15    |
| 16    | PtSnIn/08Zr-Al                                     | 0.3         | 600           | 57.7–51.7                        | 98                                                              | 0.74                                                   | 0.097                                               | 16    |
| 17    | 0.1Pt10Cu/Al <sub>2</sub> O <sub>3</sub>           | 0.1         | 600           | 40–22                            | 90                                                              | 1.97                                                   | 0.215                                               | 17    |
| 18    | Pt-Sn/SAPO-34-500                                  | 0.5         | 595           | 34.6–43.9                        | 66                                                              | 0.48                                                   | 0.149                                               | 18    |
| 19    | Pt/Al <sub>2</sub> O <sub>3</sub> sheet            | 0.36        | 590           | 42.7–15.9                        | 93                                                              | 1.38                                                   | 0.058                                               | 19    |
| 20    | PtSn/Al <sub>2</sub> O <sub>3</sub> sheet          | 0.35        | 590           | 48.7–44.6                        | 98                                                              | 1.62                                                   | 0.007                                               | 19    |
| 21    | Pt-Sn-Na/Al-SBA-15                                 | 0.5         | 590           | 27.5–12.6                        | 94                                                              | 0.20                                                   | 0.024                                               | 20    |
| 22    | Pt-Na/Sn-ZSM-5                                     | 0.5         | 590           | 41.7–39.1                        | 95.3                                                            | 0.30                                                   | 0.011                                               | 21    |
| 23    | PtNa/Zn(1.0%)-ZSM-5                                | 0.5         | 590           | 40.6–37.8                        | 93                                                              | 0.29                                                   | 0.012                                               | 22    |
| 24    | Pt-Sn/mesoporous Al <sub>2</sub> O <sub>3</sub>    | 0.5         | 590           | 29.8–24.6                        | 92                                                              | 0.22                                                   | 0.044                                               | 23    |
| 25    | Pt-Sn/ZSM-5                                        | 0.5         | 590           | 33.1–26.3                        | 47.7                                                            | 0.24                                                   | 0.054                                               | 23    |
| 26    | Pt-Sn/γ-Al <sub>2</sub> O <sub>3</sub>             | 0.5         | 590           | 29.4–22.7                        | 76                                                              | 0.21                                                   | 0.058                                               | 23    |
| 27    | Pt-Sn/SBA-15                                       | 0.5         | 590           | 11.0–6.0                         | 80                                                              | 0.08                                                   | 0.110                                               | 23    |
| 28    | PtSnAl <sub>0.2</sub> /SBA-15                      | 0.5         | 590           | 55.9–40.5                        | 98.5                                                            | 0.32                                                   | 0.104                                               | 24    |
| 29    | Pt-Cu/MgAl <sub>2</sub> O <sub>4</sub>             | 1           | 590           | 25.7–21.0                        | 87.5                                                            | 0.24                                                   | 0.011                                               | 25    |
| 30    | Pt-Ag/MgAl <sub>2</sub> O <sub>4</sub>             | 1           | 590           | 30.6–16.7                        | 95.1                                                            | 0.28                                                   | 0.034                                               | 25    |
| 31    | Pt-Au/MgAl <sub>2</sub> O <sub>4</sub>             | 1           | 590           | 33.7–16.6                        | 60                                                              | 0.31                                                   | 0.040                                               | 25    |
| 32    | Pt-Sn-2/MgAl <sub>2</sub> O <sub>4</sub>           | 0.55        | 580           | 44–18.7                          | 92                                                              | 0.23                                                   | 0.014                                               | 26    |
| 33    | Pt-Sn-3/MgAl <sub>2</sub> O <sub>4</sub>           | 0.53        | 580           | 42–18.7                          | 97                                                              | 0.23                                                   | 0.013                                               | 26    |
| 34    | Pt-Sn-4/MgAl <sub>2</sub> O <sub>4</sub>           | 0.5         | 580           | 50–31.5                          | 98                                                              | 0.29                                                   | 0.009                                               | 26    |
| 35    | Pt-Sn-5/MgAl <sub>2</sub> O <sub>4</sub>           | 0.42        | 580           | 45–37.6                          | 98                                                              | 0.31                                                   | 0.003                                               | 26    |
| 36    | Pt-Sn-6/MgAl <sub>2</sub> O <sub>4</sub>           | 0.39        | 580           | 44–38.9                          | 99                                                              | 0.33                                                   | 0.002                                               | 26    |
| 37    | Pt/0.5Sn-SBA-15                                    | 0.72        | 580           | 43.8–38.3                        | 98.5                                                            | 0.62                                                   | 0.038                                               | 27    |
| 38    | Pt-Sn/MgAl <sub>2</sub> O <sub>4</sub> -ALT        | 1           | 575           | 33–29                            | 99                                                              | 0.59                                                   | 0.057                                               | 28    |
| 39    | Pt <sup>0</sup> Zn <sup>δ+</sup> /SiO <sub>2</sub> | 3.05        | 550           | 30.2–16.1                        | 98.1                                                            | 0.96                                                   | 0.027                                               | 29    |
| 40    | Ga <sup>δ+</sup> Pt <sup>0</sup> /SiO <sub>2</sub> | 1.55        | 550           | 31.9–18.2                        | 99                                                              | 1.36                                                   | 0.038                                               | 3     |
| 41    |                                                    | 1.55        | 550           | 36.5–26.9                        | 90.9                                                            | 0.76                                                   | 0.023                                               | 3     |
| 42    |                                                    | 1.55        | 550           | 40.7–38.5                        | 63.5                                                            | 0.04                                                   | 0.005                                               | 3     |
| 43    | Pt/Mg(Sn)(Al)O                                     | 0.5         | 550           | 29.4–27.8                        | 93.7                                                            | 0.64                                                   | 0.001                                               | 10    |
| 44    | 2Pt-0.6Sn/γ-Al <sub>2</sub> O <sub>3</sub>         | 2           | 540           | 42.9–39.2                        | 93.7                                                            | 0.09                                                   | 0.020                                               | 30    |
| 45    | 2Pt-1.2Sn/γ-Al <sub>2</sub> O <sub>3</sub>         | 2           | 540           | 43.5–41.4                        | 96.9                                                            | 0.09                                                   | 0.011                                               | 30    |
| 46    | 2Pt-2.4Sn/γ-Al <sub>2</sub> O <sub>3</sub>         | 2           | 540           | 42.8–41.7                        | 98.3                                                            | 0.09                                                   | 0.006                                               | 30    |
| 47    | 2Pt-3.6Sn/γ-Al <sub>2</sub> O <sub>3</sub>         | 2           | 540           | 42.8–41.8                        | 98.6                                                            | 0.09                                                   | 0.005                                               | 30    |
| 48    | 0.1Pt10Cu/Al <sub>2</sub> O <sub>3</sub>           | 0.1         | 520           | 13.1–12.4                        | 90                                                              | 0.65                                                   | 0.001                                               | 17    |
| 49    | Pt-Na-[Fe]/ZSM-5                                   | 0.1         | 520           | 33–13                            | 98.3                                                            | 1.51                                                   | 0.008                                               | 31    |

<sup>[a]</sup> The first value was obtained at the beginning of the run, and the second at the end. <sup>[b]</sup>The C<sub>3</sub>H<sub>6</sub> selectivity was obtained at the beginning of the run. <sup>[c]</sup>Defined as (mol reacted propane) per (mol Pt\*(s)). <sup>[d]</sup>The first-order deactivation model was used to estimate the catalytic stability.<sup>6</sup>

**Supplementary Table 4.** Summary of the catalytic data of PtGa-Pb and other reported Pt-based catalysts for PDH.

| entry | catalyst                                                             | Pt (wt%) | temp. (°C) | WHSV (h <sup>-1</sup> ) <sup>[a]</sup> | gas composition                                                             | $\tau$ (h) <sup>[b]</sup> | operation time (h) <sup>[c]</sup> | ref   |
|-------|----------------------------------------------------------------------|----------|------------|----------------------------------------|-----------------------------------------------------------------------------|---------------------------|-----------------------------------|-------|
| 1     | PtIn/Mg(Al)O-600                                                     | 0.6      | 620        | 3.3                                    | C <sub>3</sub> H <sub>8</sub> /H <sub>2</sub> /Ar = 8/7/35                  | 37.5                      | 41.0                              | 7     |
| 2     | PtIn/Mg(Al)O-x                                                       | 0.6      | 620        | 3.3                                    | C <sub>3</sub> H <sub>8</sub> /H <sub>2</sub> /Ar = 8/7/35                  | 8.5                       | 8.0                               | 8     |
| 3     | 0.3PtSn/1.5In-Al                                                     | 0.3      | 620        | 3.3                                    | C <sub>3</sub> H <sub>8</sub> /H <sub>2</sub> /Ar = 8/7/35                  | 7.0                       | 2.8                               | 9     |
| 4     | PtGa/SiO <sub>2</sub>                                                | 3        | 600        | 30.7                                   | C <sub>3</sub> H <sub>8</sub> = 3.9, H <sub>2</sub> = 5, He = 40            | 54.1                      | 50.0                              | This  |
| 5     | PtGa-Pb/SiO <sub>2</sub> (Pt/Pb = 2)                                 | 3        | 600        | 30.7                                   | C <sub>3</sub> H <sub>8</sub> = 3.9, H <sub>2</sub> = 5, He = 40            | 1159.0                    | 96.0                              | Study |
| 6     | Pt/Mg(Sn)(Al)O                                                       | 0.5      | 600        | 14                                     | C <sub>3</sub> H <sub>8</sub> /H <sub>2</sub> /Ar = 1/0.5/2                 | 561.2                     | 48.0                              | 10    |
| 7     | Pt <sub>3</sub> In/SiO <sub>2</sub>                                  | 0.3      | 600        | 3                                      | C <sub>3</sub> H <sub>8</sub> /H <sub>2</sub> = 1/1, balance N <sub>2</sub> | 57.1                      | 2.5                               | 11    |
| 8     | Pt3Ga/CeAl                                                           | 1        | 600        | 10                                     | C <sub>3</sub> H <sub>8</sub> /H <sub>2</sub> = 1/1, balance N <sub>2</sub> | 39.0                      | 15.0                              | 12    |
| 9     | Pt3Ga/Al <sub>2</sub> O <sub>3</sub>                                 | 1        | 600        | 10                                     | C <sub>3</sub> H <sub>8</sub> /H <sub>2</sub> = 1/1, balance N <sub>2</sub> | 29.5                      | 15.0                              | 12    |
| 10    | Pt/CeAl                                                              | 1        | 600        | 10                                     | C <sub>3</sub> H <sub>8</sub> /H <sub>2</sub> = 1/1, balance N <sub>2</sub> | 13.2                      | 15.0                              | 12    |
| 11    | PtSn/TS-1                                                            | 0.5      | 600        | 3                                      | C <sub>3</sub> H <sub>8</sub> /H <sub>2</sub> /N <sub>2</sub> = 1/1/4       | 30.1                      | 7.0                               | 13    |
| 12    | 15%Zn-0.1%/Al <sub>2</sub> O <sub>3</sub>                            | –        | 600        | 3                                      | C <sub>3</sub> H <sub>8</sub> /H <sub>2</sub> = 1/1, balance N <sub>2</sub> | 22.1                      | 4.0                               | 14    |
| 13    | Pt/TA0                                                               | 1        | 600        | 10                                     | C <sub>3</sub> H <sub>8</sub> /H <sub>2</sub> /N <sub>2</sub> = 13/13/24    | 7.4                       | 10.0                              | 15    |
| 14    | Pt/TA10                                                              | 1        | 600        | 10                                     | C <sub>3</sub> H <sub>8</sub> /H <sub>2</sub> /N <sub>2</sub> = 13/13/24    | 10.6                      | 10.0                              | 15    |
| 15    | Pt/TA20                                                              | 1        | 600        | 10                                     | C <sub>3</sub> H <sub>8</sub> /H <sub>2</sub> /N <sub>2</sub> = 13/13/24    | 7.4                       | 10.0                              | 15    |
| 16    | PtSnIn/08Zr-Al                                                       | 0.3      | 600        | 3.3                                    | C <sub>3</sub> H <sub>8</sub> /H <sub>2</sub> /Ar = 8/7/35                  | 10.3                      | 2.5                               | 16    |
| 17    | 0.1Pt10Cu/Al <sub>2</sub> O <sub>3</sub>                             | 0.1      | 600        | 4.0                                    | C <sub>3</sub> H <sub>8</sub> /H <sub>2</sub> = 1/1                         | 4.7                       | 4.0                               | 17    |
| 18    | Pt-Sn/SAPO-34-500                                                    | 0.5      | 595        | 5.6                                    | C <sub>3</sub> H <sub>8</sub> /H <sub>2</sub> = 4/1                         | 6.7                       | 8.0                               | 18    |
| 19    | Pt/Al <sub>2</sub> O <sub>3</sub> sheet                              | 0.36     | 590        | 9.4                                    | C <sub>3</sub> H <sub>8</sub> /H <sub>2</sub> /N <sub>2</sub> = 1:1.25:4    | 17.1                      | 24.0                              | 19    |
| 20    | PtSn/Al <sub>2</sub> O <sub>3</sub> sheet                            | 0.35     | 590        | 9.4                                    | C <sub>3</sub> H <sub>8</sub> /H <sub>2</sub> /N <sub>2</sub> = 1:1.25:4    | 142.6                     | 24.0                              | 19    |
| 21    | Pt-Sn-Na/Al-SBA-15                                                   | 0.5      | 590        | 3.0                                    | C <sub>3</sub> H <sub>8</sub> /H <sub>2</sub> = 75/25                       | 41.3                      | 40.0                              | 20    |
| 22    | Pt-Na/Sn-ZSM-5                                                       | 0.5      | 590        | 3.0                                    | C <sub>3</sub> H <sub>8</sub> /H <sub>2</sub> = 75/25                       | 92.6                      | 9.0                               | 21    |
| 23    | PtNa/Zn(1.0%)-ZSM-5                                                  | 0.5      | 590        | 3.0                                    | C <sub>3</sub> H <sub>8</sub> /H <sub>2</sub> = 4/1                         | 85.1                      | 9.0                               | 22    |
| 24    | Pt-Sn/mesoporous Al <sub>2</sub> O <sub>3</sub>                      | 0.5      | 590        | 3.0                                    | C <sub>3</sub> H <sub>8</sub> /H <sub>2</sub> = 4                           | 22.8                      | 6.0                               | 23    |
| 25    | Pt-Sn/ZSM-5                                                          | 0.5      | 590        | 3.0                                    | C <sub>3</sub> H <sub>8</sub> /H <sub>2</sub> = 4                           | 18.4                      | 6.0                               | 23    |
| 26    | Pt-Sn/ $\gamma$ -Al <sub>2</sub> O <sub>3</sub>                      | 0.5      | 590        | 3.0                                    | C <sub>3</sub> H <sub>8</sub> /H <sub>2</sub> = 4                           | 17.2                      | 6.0                               | 23    |
| 27    | Pt-Sn/SBA-15                                                         | 0.5      | 590        | 3.0                                    | C <sub>3</sub> H <sub>8</sub> /H <sub>2</sub> = 4                           | 9.1                       | 6.0                               | 23    |
| 28    | PtSnAl <sub>0.2</sub> /SBA-15                                        | 0.5      | 590        | 2.5                                    | C <sub>3</sub> H <sub>8</sub> /Ar = 1/5                                     | 9.6                       | 6.0                               | 24    |
| 29    | Pt-Cu/MgAl <sub>2</sub> O <sub>4</sub>                               | 1        | 590        | 6.8                                    | C <sub>3</sub> H <sub>8</sub> = 19, H <sub>2</sub> = 19, He = 2             | 89.2                      | 24.0                              | 25    |
| 30    | Pt-Ag/MgAl <sub>2</sub> O <sub>4</sub>                               | 1        | 590        | 6.8                                    | C <sub>3</sub> H <sub>8</sub> = 19, H <sub>2</sub> = 19, He = 2             | 29.8                      | 24.0                              | 25    |
| 31    | Pt-Au/MgAl <sub>2</sub> O <sub>4</sub>                               | 1        | 590        | 6.8                                    | C <sub>3</sub> H <sub>8</sub> = 19, H <sub>2</sub> = 19, He = 2             | 25.1                      | 24.0                              | 25    |
| 32    | Pt-Sn-2/MgAl <sub>2</sub> O <sub>4</sub>                             | 0.55     | 580        | 2.4                                    | C <sub>3</sub> H <sub>8</sub> = 2, H <sub>2</sub> = 2, He = 16              | 73.3                      | 90.0                              | 26    |
| 33    | Pt-Sn-3/MgAl <sub>2</sub> O <sub>4</sub>                             | 0.53     | 580        | 2.4                                    | C <sub>3</sub> H <sub>8</sub> = 2, H <sub>2</sub> = 2, He = 16              | 78.5                      | 90.0                              | 26    |
| 34    | Pt-Sn-4/MgAl <sub>2</sub> O <sub>4</sub>                             | 0.5      | 580        | 2.4                                    | C <sub>3</sub> H <sub>8</sub> = 2, H <sub>2</sub> = 2, He = 16              | 115.9                     | 90.0                              | 26    |
| 35    | Pt-Sn-5/MgAl <sub>2</sub> O <sub>4</sub>                             | 0.42     | 580        | 2.4                                    | C <sub>3</sub> H <sub>8</sub> = 2, H <sub>2</sub> = 2, He = 16              | 294.2                     | 90.0                              | 26    |
| 36    | Pt-Sn-6/MgAl <sub>2</sub> O <sub>4</sub>                             | 0.39     | 580        | 2.4                                    | C <sub>3</sub> H <sub>8</sub> = 2, H <sub>2</sub> = 2, He = 16              | 427.8                     | 90.0                              | 26    |
| 37    | Pt/0.5Sn-SBA-15                                                      | 0.72     | 580        | 8.3                                    | C <sub>3</sub> H <sub>8</sub> /Ar = 7/3                                     | 26.4                      | 6.0                               | 27    |
| 38    | Pt-Sn/MgAl <sub>2</sub> O <sub>4</sub> -ALT                          | 1        | 575        | 14.7                                   | C <sub>3</sub> H <sub>8</sub> /H <sub>2</sub> = 1.2, balance He             | 17.6                      | 3.3                               | 28    |
| 39    | Pt <sup>0</sup> Zn <sup><math>\delta</math>+</sup> /SiO <sub>2</sub> | 3.05     | 550        | 75                                     | C <sub>3</sub> H <sub>8</sub> /Ar = 10/40                                   | 36.8                      | 3.5                               | 29    |
| 40    | Ga <sup><math>\delta</math>+</sup> Pt <sup>0</sup> /SiO <sub>2</sub> | 1.55     | 550        | 98.3                                   | C <sub>3</sub> H <sub>8</sub> /Ar = 1:4                                     | 26.5                      | 20.0                              | 3     |
| 41    |                                                                      | 1.55     | 550        | 43.3                                   | C <sub>3</sub> H <sub>8</sub> /Ar = 1:4                                     | 44.2                      | 20.0                              | 3     |
| 42    |                                                                      | 1.55     | 550        | 2.0                                    | C <sub>3</sub> H <sub>8</sub> /Ar = 1:4                                     | 214.1                     | 20.0                              | 3     |
| 43    | Pt/Mg(Sn)(Al)O                                                       | 0.5      | 550        | 14                                     | C <sub>3</sub> H <sub>8</sub> /H <sub>2</sub> /Ar = 1/0.5/2                 | 1531.2                    | 240.0                             | 10    |
| 44    | 2Pt-0.6Sn/ $\gamma$ -Al <sub>2</sub> O <sub>3</sub>                  | 2        | 540        | 3.5                                    | C <sub>3</sub> H <sub>8</sub> /H <sub>2</sub> /N <sub>2</sub> = 6/2/42      | 49.0                      | 6.0                               | 30    |
| 45    | 2Pt-1.2Sn/ $\gamma$ -Al <sub>2</sub> O <sub>3</sub>                  | 2        | 540        | 3.5                                    | C <sub>3</sub> H <sub>8</sub> /H <sub>2</sub> /N <sub>2</sub> = 6/2/42      | 87.2                      | 6.0                               | 30    |
| 46    | 2Pt-2.4Sn/ $\gamma$ -Al <sub>2</sub> O <sub>3</sub>                  | 2        | 540        | 3.5                                    | C <sub>3</sub> H <sub>8</sub> /H <sub>2</sub> /N <sub>2</sub> = 6/2/42      | 166.4                     | 6.0                               | 30    |
| 47    | 2Pt-3.6Sn/ $\gamma$ -Al <sub>2</sub> O <sub>3</sub>                  | 2        | 540        | 3.5                                    | C <sub>3</sub> H <sub>8</sub> /H <sub>2</sub> /N <sub>2</sub> = 6/2/42      | 183.0                     | 6.0                               | 30    |
| 48    | 0.1Pt10Cu/Al <sub>2</sub> O <sub>3</sub>                             | 0.1      | 520        | 4.0                                    | C <sub>3</sub> H <sub>8</sub> /H <sub>2</sub> = 1/1                         | 1906.6                    | 120.0                             | 17    |
| 49    | Pt-Na-[Fe]/ZSM-5                                                     | 0.1      | 520        | 15.1                                   | C <sub>3</sub> H <sub>8</sub> /He = 25/75                                   | 125.0                     | 166.0                             | 31    |

<sup>[a]</sup> WHSV: weight hourly space velocity (h<sup>-1</sup>). <sup>[b]</sup> Expected catalyst life defined as  $\tau = k_d^{-1}$ . <sup>[c]</sup> operation time: total time tested for a single run.

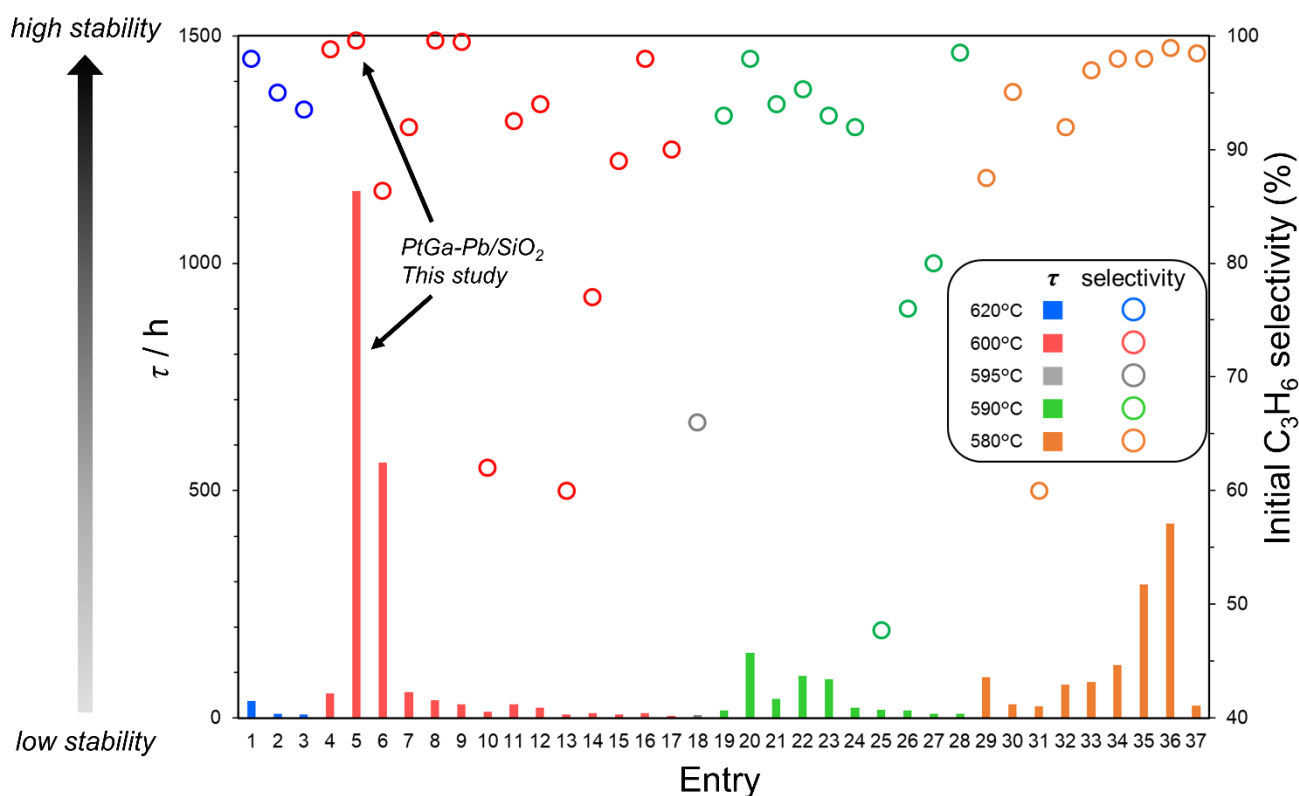

**Supplementary Figure 11.** At-a-glance chart of the catalytic performance of PtGa-Pb/SiO<sub>2</sub> (Pt/Pb = 2) and existing Pt-based catalysts in PDH (references are listed in Supplementary Tables 3 and 4). Expected catalyst life ( $\tau = k_d^{-1}$ ) and initial C<sub>3</sub>H<sub>6</sub> selectivity are categorized by reaction temperature (580–620°C). The results of previous studies conducted at temperatures lower than 570°C and higher than 630°C were omitted due to low C<sub>3</sub>H<sub>8</sub> conversion or production rate and the lack of long-term stability, respectively.

**Supplementary Table 5.** Summary of catalytic performance of SiO<sub>2</sub>-supported Pt-based materials in PDH at 600°C.

| Catalyst            | C <sub>3</sub> H <sub>8</sub> Conversion (%) |             | $k_d$ (h <sup>-1</sup> ) <sup>[a]</sup> | $\tau$ (h) <sup>[b]</sup> | C <sub>3</sub> H <sub>6</sub> selectivity (%) at 0.5 h |
|---------------------|----------------------------------------------|-------------|-----------------------------------------|---------------------------|--------------------------------------------------------|
|                     | at 0.5 h                                     | at 50 h     |                                         |                           |                                                        |
| Pt                  | 30.7                                         | 10.8        | 0.026                                   | 38.2                      | 86.8                                                   |
| Pt-Ga (Pt/Ga = 3)   | 38.9                                         | 17.7        | 0.022                                   | 45.6                      | 89.8                                                   |
| PtGa                | 44.7                                         | 24.5        | 0.018                                   | 54.1                      | 98.8                                                   |
| PtGa-Pb (Pt/Pb = 2) | 30.3 (4 h)                                   | 28.4 (96 h) | 0.001                                   | 1159                      | 99.6                                                   |
| Pt <sub>3</sub> Sn  | 39.1                                         | 18.0        | 0.022                                   | 46.1                      | 97.5                                                   |
| PtSn                | 33.6                                         | 21.0        | 0.013                                   | 76.9                      | 99.2                                                   |
| Pt <sub>3</sub> In  | 34.6                                         | 13.9        | 0.024                                   | 41.7                      | 94.9                                                   |
| Pt-Pb (Pt/Pb = 3)   | 28.8                                         | 13.7        | 0.019                                   | 53.0                      | 96.1                                                   |

<sup>[a]</sup> Deactivation rate constant. <sup>[b]</sup> Expected catalyst life.

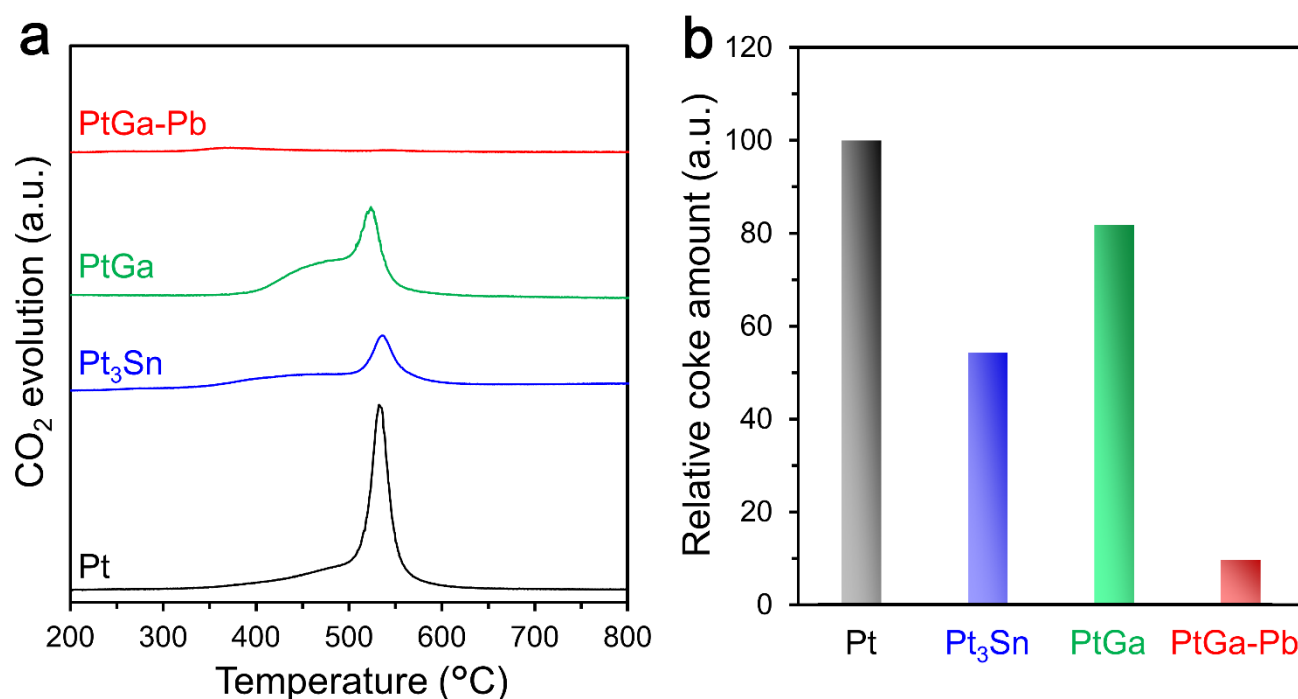

**Supplementary Figure 12.** **a** Temperature-programmed oxidation (TPO) profiles of the spent catalysts (without quartz sand) in the dehydrogenation of propane at 600°C for 20 h. **b** The relative coke amount accumulated on the catalysts (200–800°C) estimated from TPO experiment.

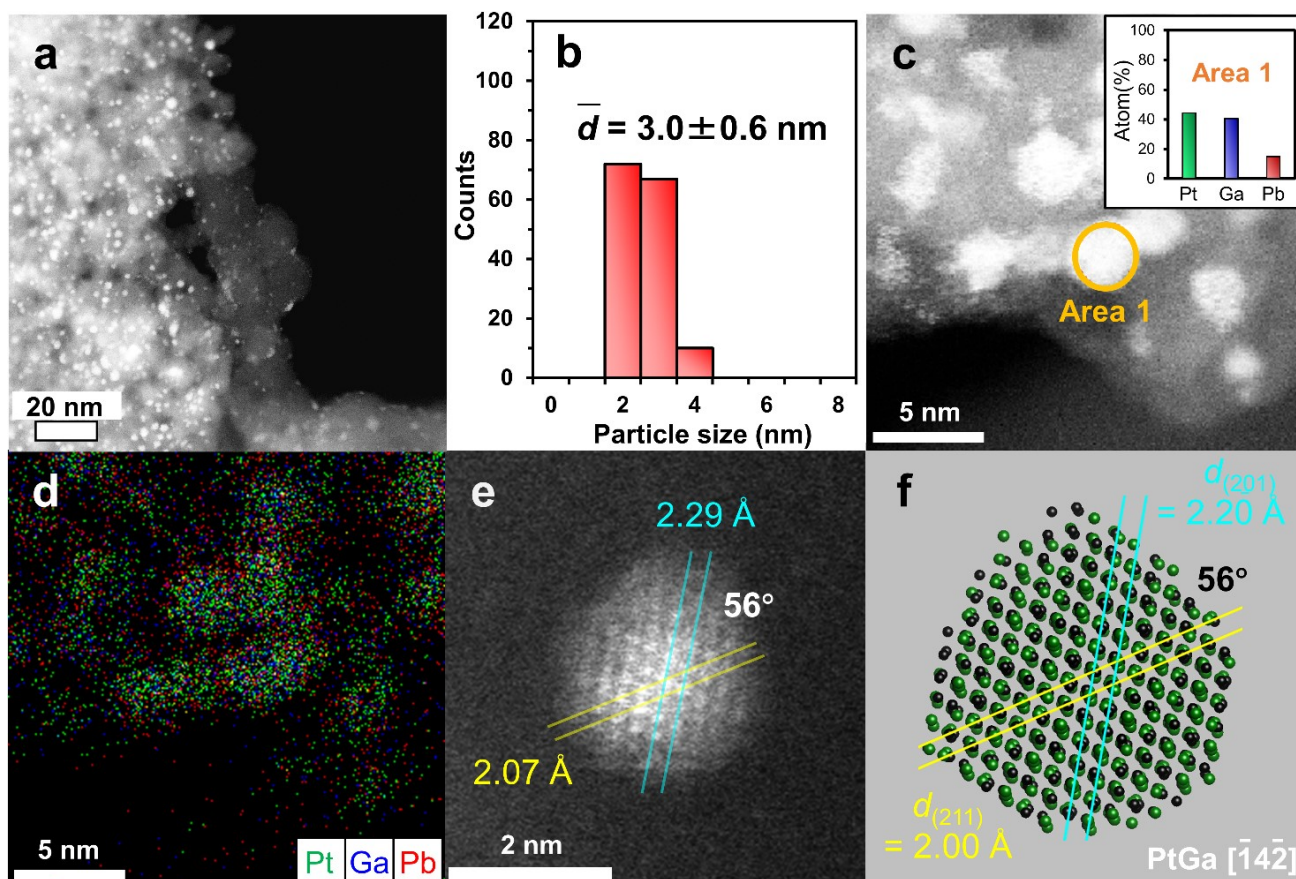

**Supplementary Figure 13.** **a** HAADF-STEM image of the spent PtGa-Pb/SiO<sub>2</sub> (Pt/Pb = 2) in PDH (600°C for 50 h) and **b** the size distribution of nanoparticles. The particle size distribution was narrow with small and uniform nanoparticles. The particle sizes ranged from 1 nm to 4 nm with a volume weighted average of  $3.0 \pm 0.6$  nm. The aggregation of the nanoparticles was not observed before ( $2.8 \pm 0.6$  nm) and after ( $3.0 \pm 0.6$  nm) the dehydrogenation of propane at 600°C for 50 h. **c** HAADF-STEM image of the spent PtGa-Pb/SiO<sub>2</sub> (Pt/Pb = 2) and **d** corresponding elemental map of Pt, Ga, Pb acquired by EDS. Inset in **c** shows the atom% included in area 1 (orange circle). **e** HAADF-STEM image of a single nanoparticle in the spent PtGa-Pb/SiO<sub>2</sub> (Pt/Pb = 2). **f** Crystal structure of intermetallic PtGa viewed along  $[\bar{1}4\bar{2}]$  direction.

**Supplementary Note 5.** Characterization of the spent PtGa-Pb/SiO<sub>2</sub>: Supplementary Figures 13a and b show the HAADF-STEM image of spent PtGa-Pb/SiO<sub>2</sub> (Pt/Pb = 2) and the particle size distribution, respectively. The particle size distribution was narrow (mostly 1.5–3 nm) with a volume weighted average of  $3.0 \pm 0.6$  nm, which is consistent with that of the fresh PtGa-Pb/SiO<sub>2</sub> (Pt/Pb) (Supplementary Figure 1), indicating the high resistance against the nanoparticle sintering. Supplementary Figures 13c and d shows the HAADF-STEM image of the spent PtGa-Pb/SiO<sub>2</sub> (Pt/Pb = 2) and corresponding elemental map acquired by EDX analysis, respectively. The atom% in the whole nanoparticle was consistent with that of the fresh PtGa-Pb/SiO<sub>2</sub> (Pt/Pb = 2) (Fig. 2). Supplementary Figure 13e shows the high-resolution HAADF-STEM image of the spent PtGa-Pb/SiO<sub>2</sub> (Pt/Pb = 2) with a single nanoparticle. A crystal structure with interplanar distances of 2.07 Å and 2.29 Å and the dihedral angles of 56° were observed, which agree with those of (211) and (20 $\bar{1}$ ) planes of intermetallic PtGa viewed along with  $[\bar{1}4\bar{2}]$  direction (Supplementary Figure 13f).



**Supplementary Note 6.** PtGa-M/SiO<sub>2</sub> (M = Pb, Sn, and In; Pt/M = 2): we also tested different third metal elements for the modification of PtGa (PtGa-M: M = Pb, Sn, and In; Pt/M = 2: see Supplementary Table 2 for Pt dispersion). These trimetallic catalysts were also prepared in a similar method used for PtGa-Pb/SiO<sub>2</sub> and tested in PDH at 650°C (Supplementary Figure 14). Only PtGa-Pb/SiO<sub>2</sub> exhibited a drastic improvement in the catalytic performance, while the other catalysts did not. This results demonstrated that Pb acted as an effective promoter for PtGa. This propane dehydrogenation is typically performed at 550~600°C to avoid the sintering of nanoparticles and coke formation, which originated from side reactions. Here, we employed a relatively harsh condition to obtain the deactivation trend and C<sub>3</sub>H<sub>6</sub> selectivity change trend in a short period of days.

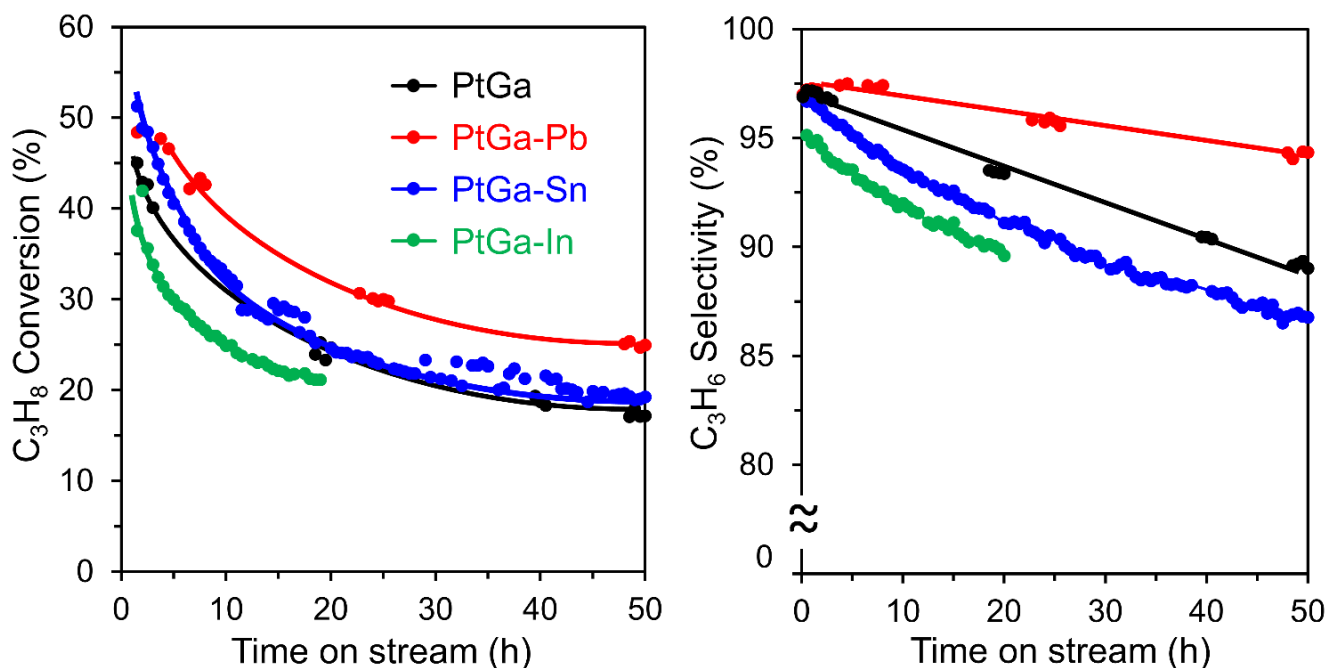

**Supplementary Figure 14.** Catalytic performances of PtGa-M/SiO<sub>2</sub> (M = Pb, Sn, and In; Pt/M = 2) in PDH at 650°C.

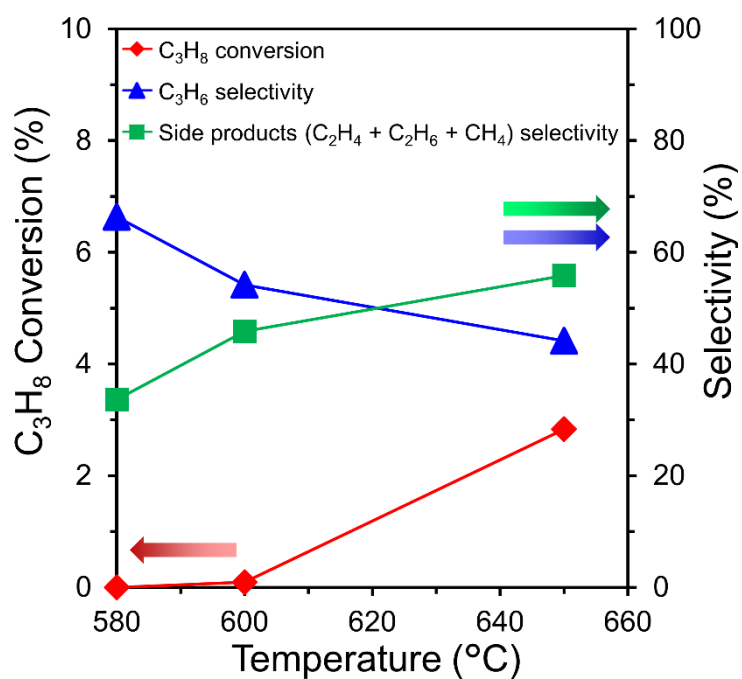

**Supplementary Figure 15.** Control experiment in PDH without catalyst (only with diluent quartz sand) at 580, 600, and 650°C. Fragmented C<sub>1</sub> and C<sub>2</sub> were formed by thermal cracking of propane particularly at 650°C, while very limited at 580, 600°C and the lower.

**Supplementary Note 7.** Silica-supported Pt-based catalysts: a series of silica-supported Pt-based bimetallic catalysts ( $\text{Pt}_x\text{M}/\text{SiO}_2$ , where  $x = 3$ , and  $\text{M} = \text{Ga}, \text{Sn}, \text{In}, \text{and Pb}$ , and  $\text{PtSn}$ ) were prepared by the co-impregnation method using freeze-drying. To identify the resulting bimetallic phases, obtained catalysts were analyzed by powder XRD (Supplementary Figure 16). The Pt dispersions estimated by CO pulse chemisorption are listed in Supplementary Table 2.  $\text{PtSn}/\text{SiO}_2$  likely has  $\text{Pt}_3\text{Sn}$ - $\text{PtSn}$  core-shell structure considering the XRD pattern and Pt dispersion lower than that of  $\text{Pt}_3\text{Sn}$ . This is consistent with the fact that alloying with Sn proceeds from outside of Pt nanoparticles, which can be formed at the early stage of  $\text{H}_2$  reduction. Therefore,  $\text{PtSn}$  phase is expected to work as the main active site.

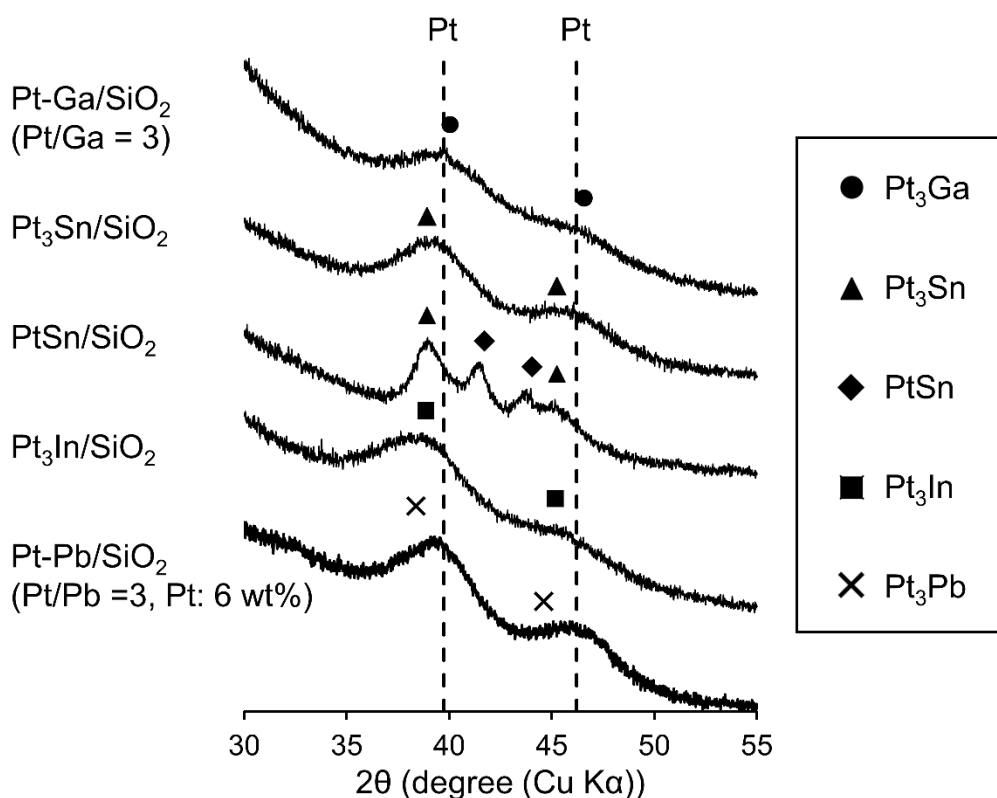

**Supplementary Figure 16.** X-ray diffraction (XRD) patterns of the silica-supported Pt-based bimetallic catalysts (Pt: 3 wt%).  $\text{Pt-Pb}/\text{SiO}_2$  (Pt/Pb = 3) with 6 wt% Pt loading was used for better visibility. Black dotted lines indicate the diffraction angles of pure Pt. The desired intermetallic phase was observed for each sample. References: Pt,<sup>32</sup>  $\text{Pt}_3\text{Ga}$ ,<sup>33</sup>  $\text{Pt}_3\text{Sn}$ ,<sup>34</sup>  $\text{PtSn}$ ,<sup>34</sup>  $\text{Pt}_3\text{In}$ ,<sup>35</sup> and  $\text{Pt}_3\text{Pb}$ .<sup>36</sup>

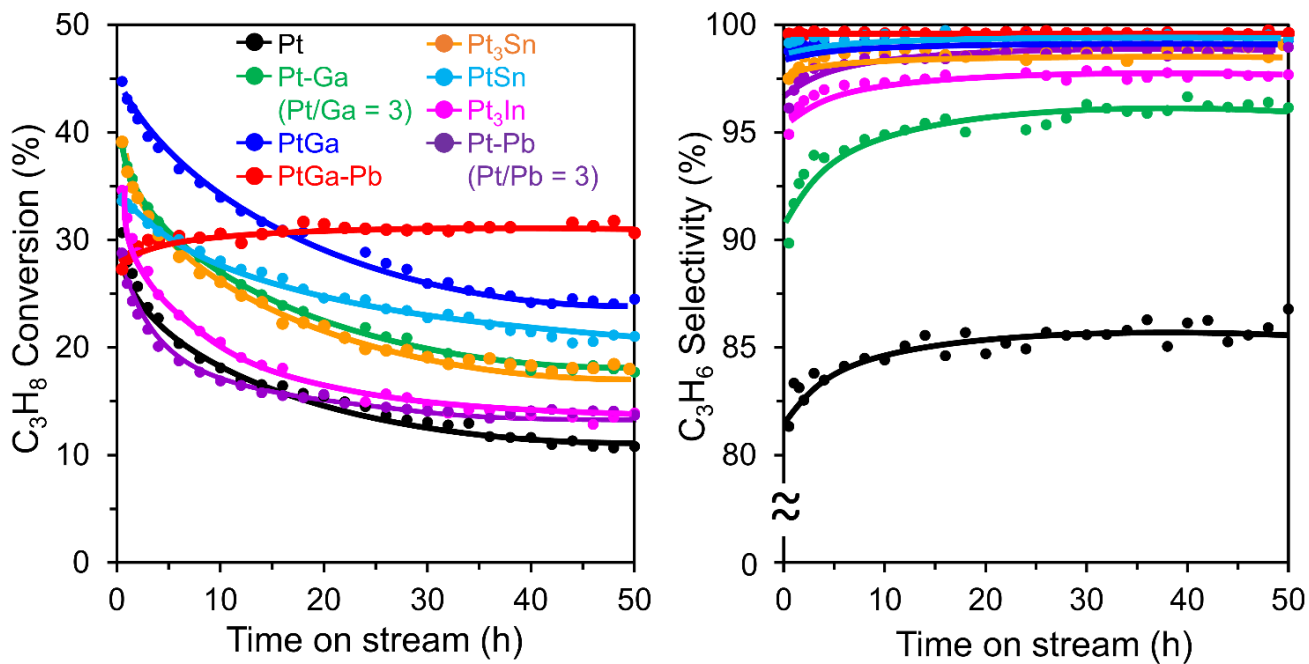

**Supplementary Figure 17.** Propane dehydrogenation on silica-supported Pt-based catalysts at 600°C.

**Supplementary Note 8.** Regeneration process: we tested the recyclability of the prepared catalyst. Prior to the second catalytic run, the spent catalysts were calcined under flowing O<sub>2</sub>/He (5% for 5 h or 20% for 1 h) at 550°C and subsequently reduced under flowing H<sub>2</sub> at 650°C for 0.5 h. We chose the calcination temperature of 550°C according to literature of a Pt–Ga system, where Pt dispersion drastically decreased after oxidation at 650°C, whereas it retained at 550°C.<sup>37</sup> This result indicates that oxidation at 650°C results in some irreversible structural changes (probably, severe oxidative dealloying or sintering). Considering our TPO experiments shown in Supplementary Figure 12, the coke accumulated on the spent catalysts was completely combusted at 550°C, demonstrating that the oxidation temperature of 550°C is high enough for coke removal. Supplementary Figure 18a shows the changes of catalytic performance of PtGa-Pb/SiO<sub>2</sub> catalyst before and after a regeneration process with 5% O<sub>2</sub>. Upon the regeneration, the catalytic performance was recovered to the original level after a short induction period. This induction period might be attributed to catalyst reconstruction: the catalyst structure (possibly, the placement of Pb atoms at the surface of PtGa) may be partly rebuilt during the regeneration process and further reconstruction to the original state occurs during the initial state of the 2nd catalytic run. We also tested the different calcination condition under 20% O<sub>2</sub>/He (as a model for aerobic oxidation) for PtGa-Pb, which showed a similar trend with a longer induction period (Supplementary Figure 18b). Thus, the catalyst can be reused by the simple regeneration procedure and has high resistance against the sintering of nanoparticles, as reported for Pt–Ga bimetallic systems.<sup>38,39</sup> The sintering of nanoparticles is one of the biggest issues in the dehydrogenation of propane.<sup>6</sup> On the other hand, other Sn-containing bimetallic (Pt<sub>3</sub>Sn and PtSn) and trimetallic (PtGa-Sn) catalysts did not recover the original catalytic performances after the regeneration process (Supplementary Figure 19). Particularly for PtSn, the C<sub>3</sub>H<sub>8</sub> conversion and C<sub>3</sub>H<sub>6</sub> selectivity significantly dropped. Thus, the PtGa-Pb/SiO<sub>2</sub> catalyst has a better recyclability than the Sn-containing catalysts.

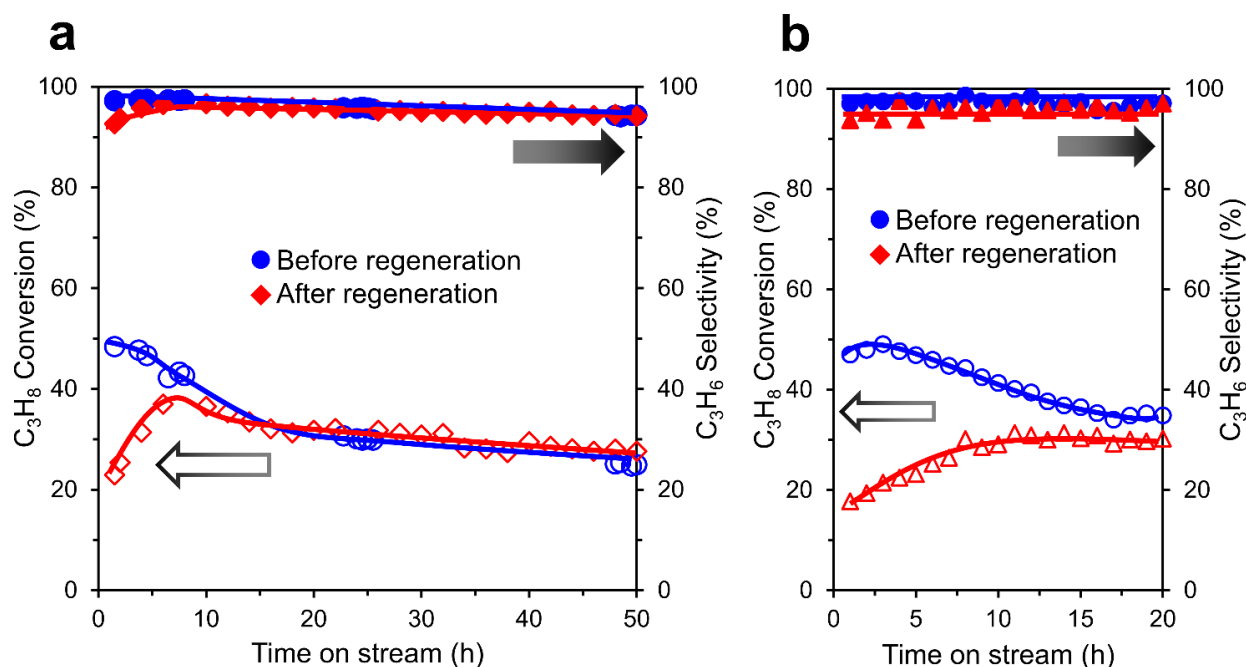

**Supplementary Figure 18.** Catalytic performances of PtGa-Pb/SiO<sub>2</sub> (Pt/Pb = 2) at 650°C before (first run) and after (second run) regeneration. The regeneration process was carried out under flowing **a** 5% O<sub>2</sub>/He ( $F = 50 \text{ mL min}^{-1}$ ) at 550°C for 5 h and **b** 20% O<sub>2</sub>/He ( $F = 50 \text{ mL min}^{-1}$ ) at 550°C for 1 h, and the subsequent H<sub>2</sub> reduction at 650°C for 0.5 h.

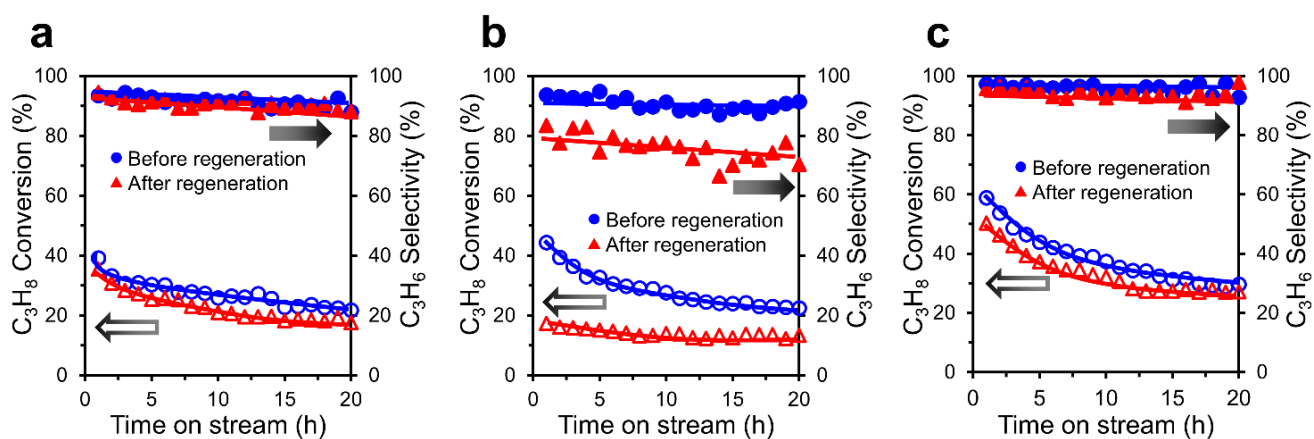

**Supplementary Figure 19.** Effect of regeneration process for the dehydrogenation of propane on **a**  $\text{Pt}_3\text{Sn}/\text{SiO}_2$ , **b**  $\text{PtSn}/\text{SiO}_2$ , and **c**  $\text{PtGa-Sn}/\text{SiO}_2$  ( $\text{Pt}/\text{Sn} = 2$ ) catalysts at  $650^\circ\text{C}$ . The regeneration process was carried out under flowing 20%  $\text{O}_2/\text{He}$  ( $F = 50 \text{ mL min}^{-1}$ ) at  $550^\circ\text{C}$  for 1 h and the subsequent  $\text{H}_2$  reduction at  $650^\circ\text{C}$  for 0.5 h.

**Supplementary Note 9.** Amount of additive Pb on  $\text{PtGa}/\text{SiO}_2$ : a series of  $\text{PtGa-Pb}/\text{SiO}_2$  ( $\text{Pt}/\text{Pb} = 5, 2.5, 2$ , and  $1.5$ ) catalysts was tested in PDH at  $650^\circ\text{C}$  (Supplementary Figure 20, see Supplementary Table 2 for the dispersions of Pt). The catalytic performance was enhanced when the Pb content increased up to  $\text{Pt}/\text{Pb} = 2$ . Further increase in Pb content ( $\text{Pt}/\text{Pb} = 1.5$ ) results in a drop of the catalytic performance particularly at the early stage of the reaction. Interestingly, the catalytic activity of  $\text{PtGa-Pb}/\text{SiO}_2$  ( $\text{Pt}/\text{Pb} = 1.5$ ) was recovered to that of  $\text{PtGa-Pb}/\text{SiO}_2$  ( $\text{Pt}/\text{Pb} = 2$ ) after a short induction period. This implies that the overloaded Pb atoms excessively block the active Pt sites (actually, Pt dispersion decreased, Supplementary Table 2), while spill-overed to release the Pt sites during the catalytic run. According to these results, we concluded that the  $\text{Pt}/\text{Pb}$  ratio of 2 was the best for our catalytic system.

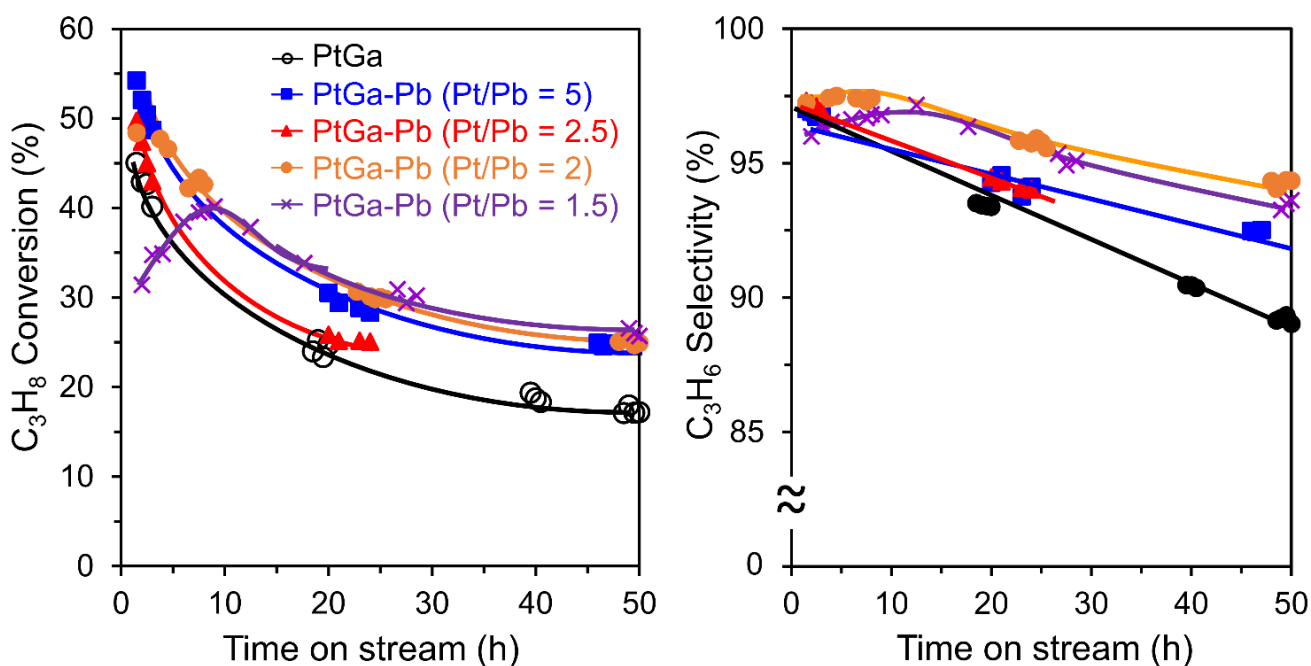

**Supplementary Figure 20.** Catalytic performances of  $\text{PtGa}/\text{SiO}_2$  and  $\text{PtGa-Pb}/\text{SiO}_2$  ( $\text{Pt}/\text{Pb} = 5, 2.5, 2$ , and  $1.5$ ) in PDH at  $650^\circ\text{C}$ .

**Supplementary Note 10.** Effect of Support for PtGa bimetallic catalyst: we surveyed catalyst supports for PtGa. In this study, PtGa supported on a series of oxide supports ( $\text{Al}_2\text{O}_3$ ,  $\text{MgAl}_2\text{O}_4$ ,  $\text{CeO}_2$ ,  $\text{CeZrO}_2$ ,  $\text{ZrO}_2$ ,  $\text{CaZrO}_3$ , and  $\text{TiO}_2$ ) were prepared by the conventional impregnation method with an excess amount of water and tested for the dehydrogenation of propane. Supplementary Figure 21 shows the time on stream of  $\text{C}_3\text{H}_6$  yield and  $\text{C}_3\text{H}_6$  selectivity during the dehydrogenation of propane on PtGa bimetallic catalyst supported on the various oxide supports. In general,  $\text{Al}_2\text{O}_3$ <sup>40,41</sup> and  $\text{MgAl}_2\text{O}_4$ <sup>42</sup> supports have been used for propane dehydrogenation owing to the hydrothermal stability and capability of dispersing small Pt nanoparticles by the presence of Al cations. These supports showed comparatively high activity and selectivity compared to the other oxide supports (except for  $\text{SiO}_2$ ). Notably, PtGa/ $\text{SiO}_2$  (prepared by the co-impregnation method using freeze-drying) exhibited the highest activity and selectivity in this catalyst support survey.

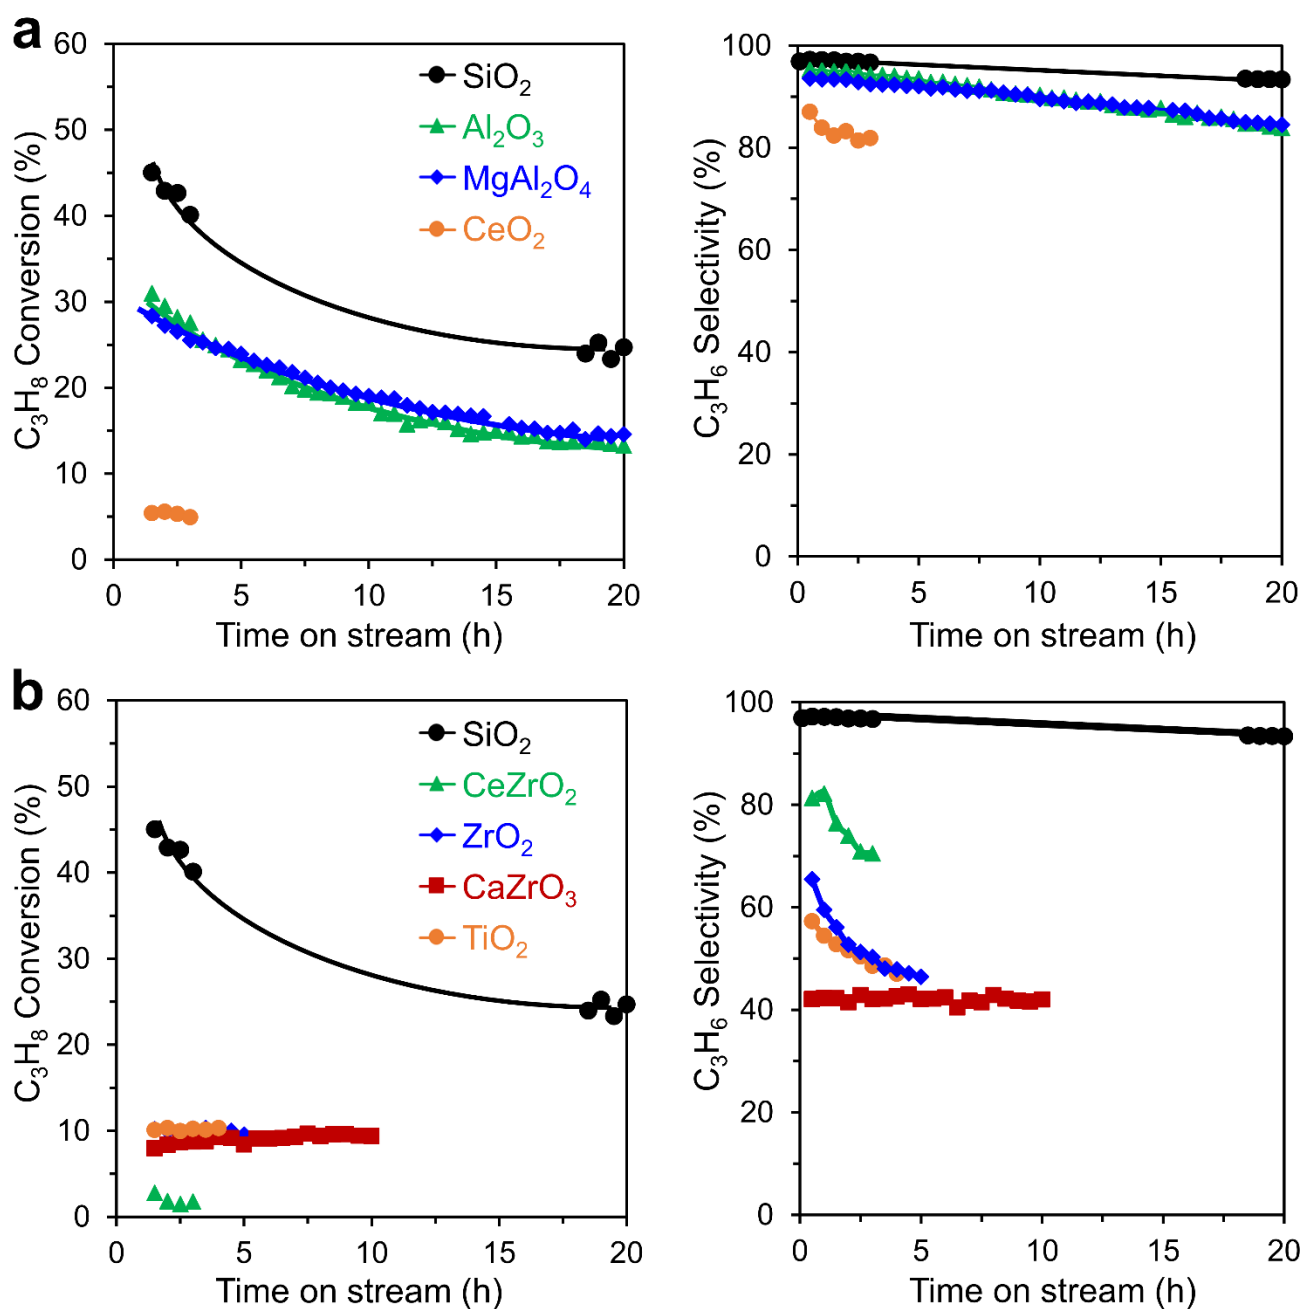

**Supplementary Figure 21. a, b** Catalytic performances of PtGa supported on various oxides in PDH at 650°C.

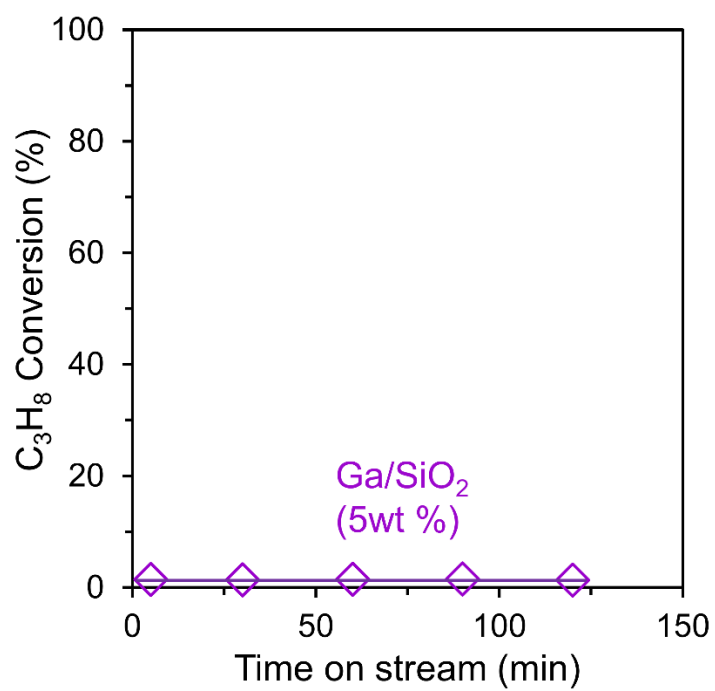

**Supplementary Figure 22.** Catalytic performances of Ga/SiO<sub>2</sub> (Ga: 5 wt%) in PDH at 650°C.



Pt<sub>3</sub>Sn-Pt<sub>3</sub> site

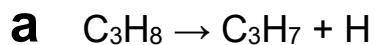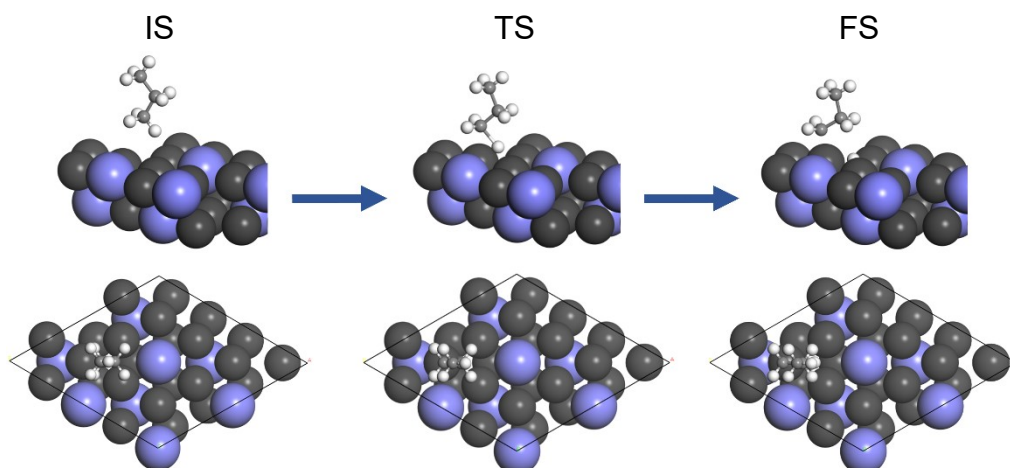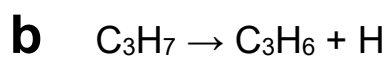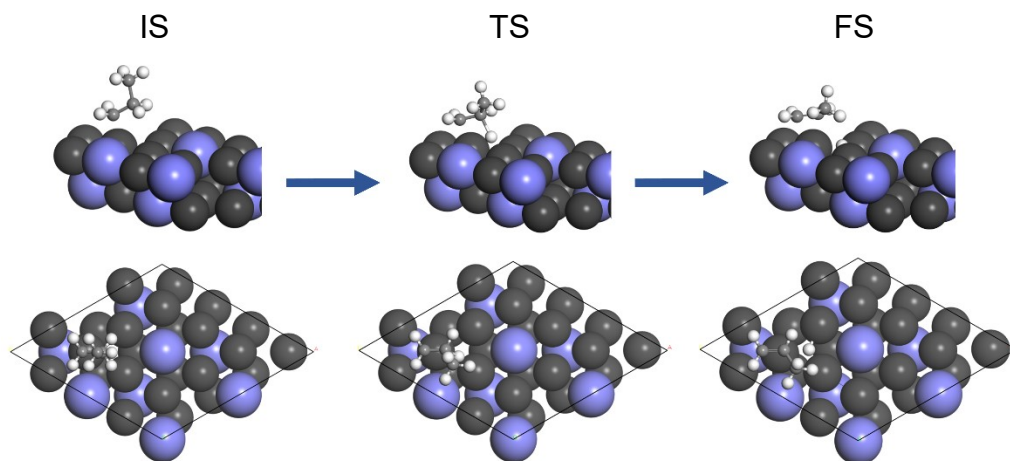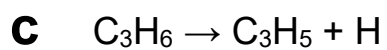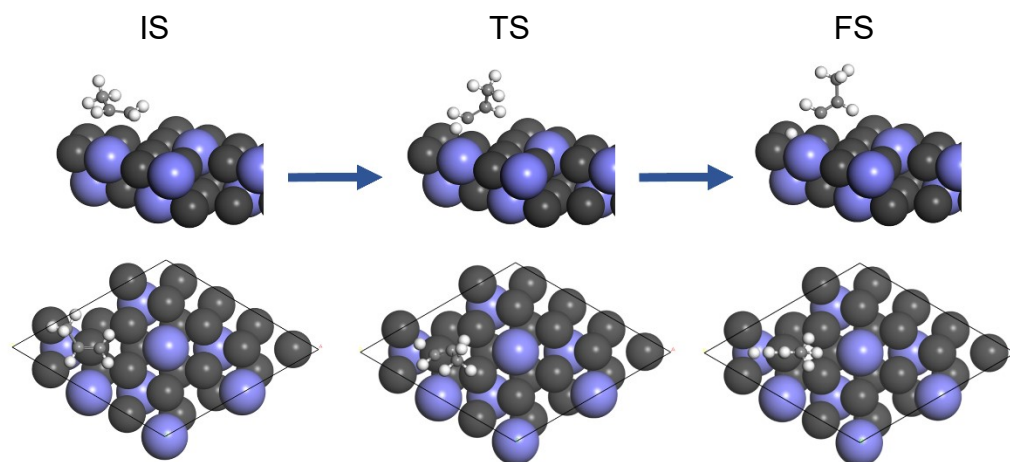

**Supplementary Figure 23.** Structures of initial (IS), transition (TS), and final states (FS) of **a** 1st, **b** 2nd, and **c** 3rd C–H scissions in PDH on the Pt<sub>3</sub>Sn(111)-Pt<sub>3</sub> site.

PtGa-Pt<sub>3</sub> site

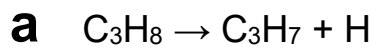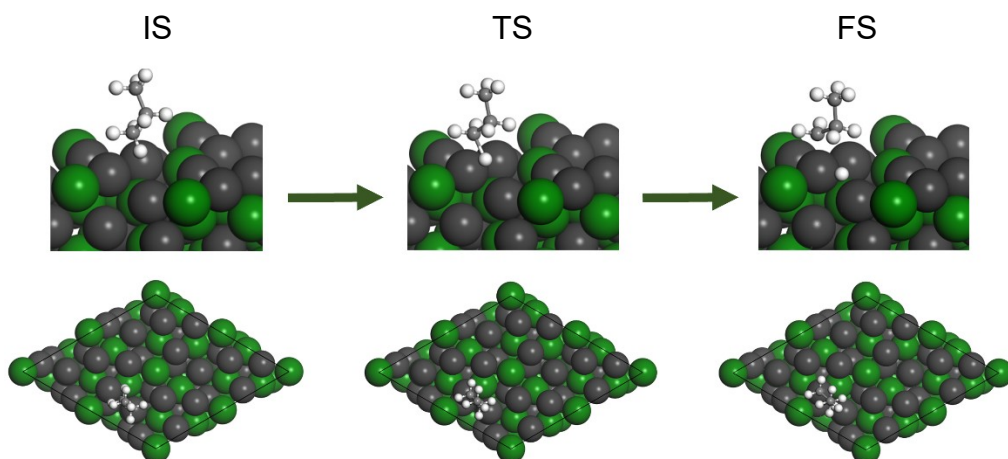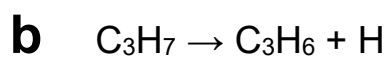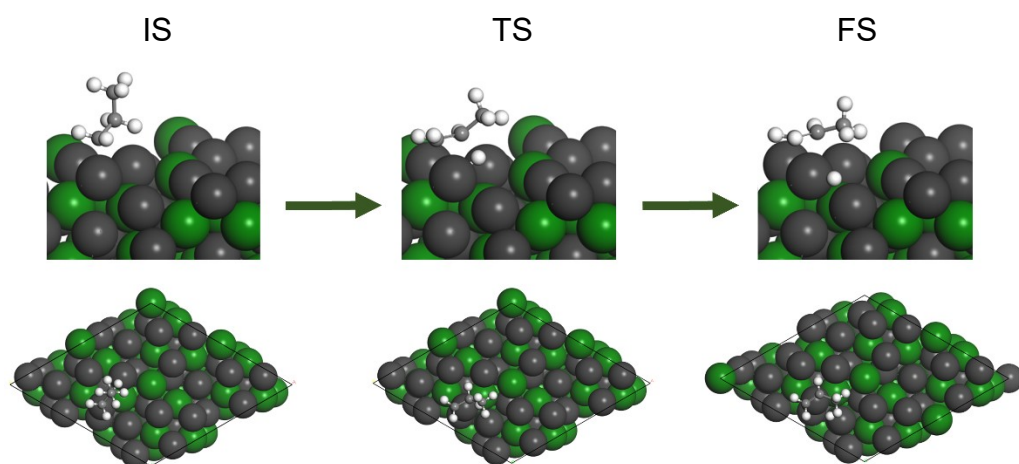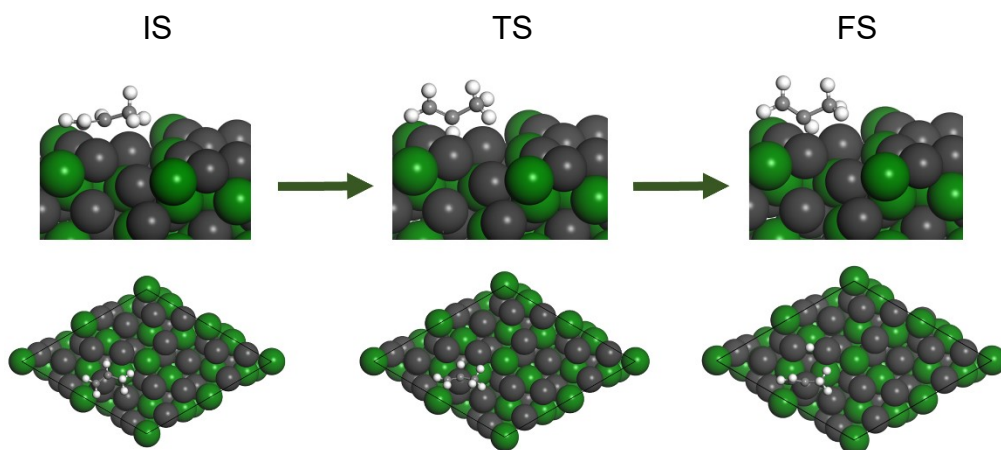

**Supplementary Figure 24.** Structures of initial (IS), transition (TS), and final states (FS) of **a** 1st, **b** 2nd, and **c** 3rd C-H scissions in PDH on the PtGa:A(111)-Pt<sub>3</sub> site.

PtGa-Pt<sub>1</sub> site

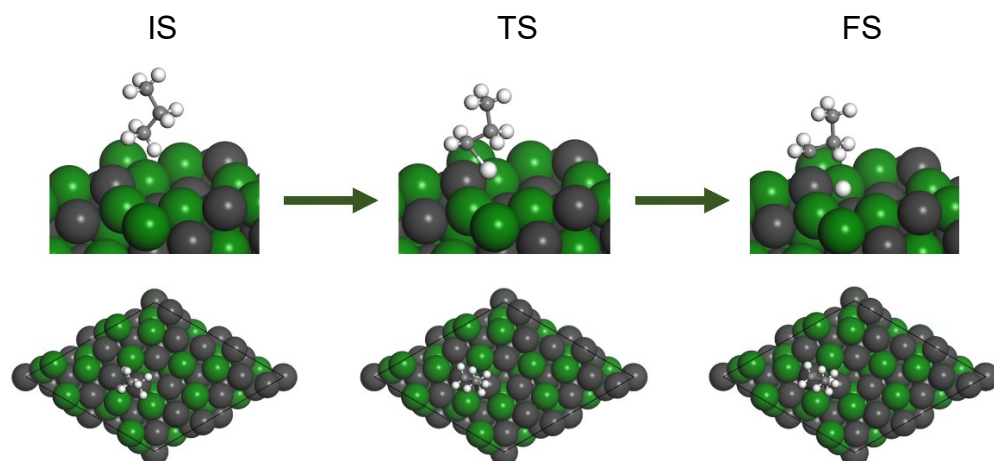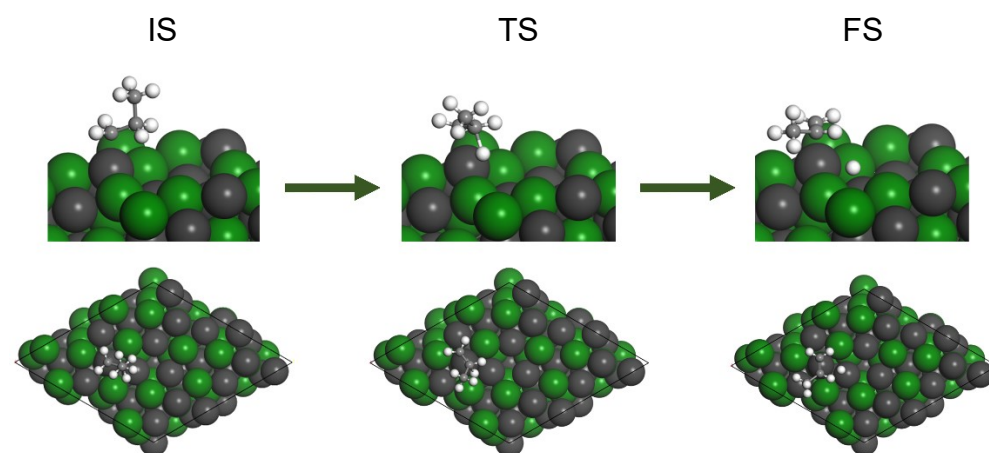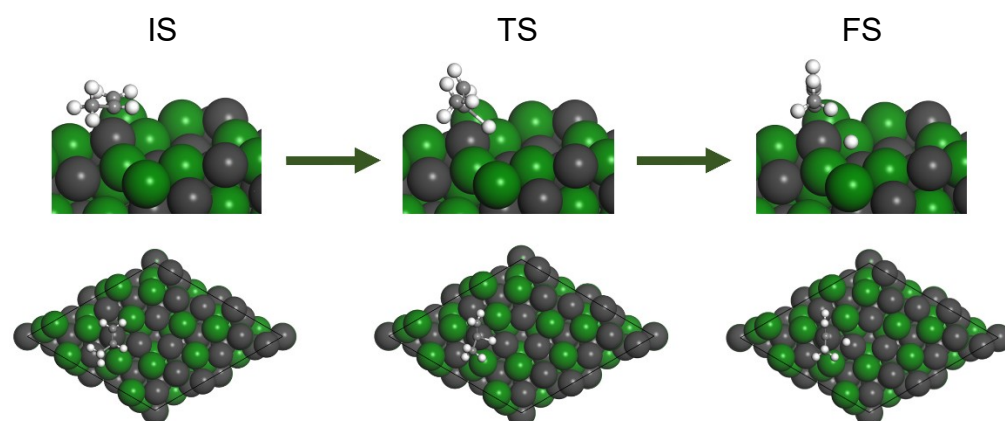

**Supplementary Figure 25.** Structures of initial (IS), transition (TS), and final states (FS) of **a** 1st, **b** 2nd, and **c** 3rd C-H scissions in PDH on the PtGa:A(111)-Pt<sub>1</sub> site.

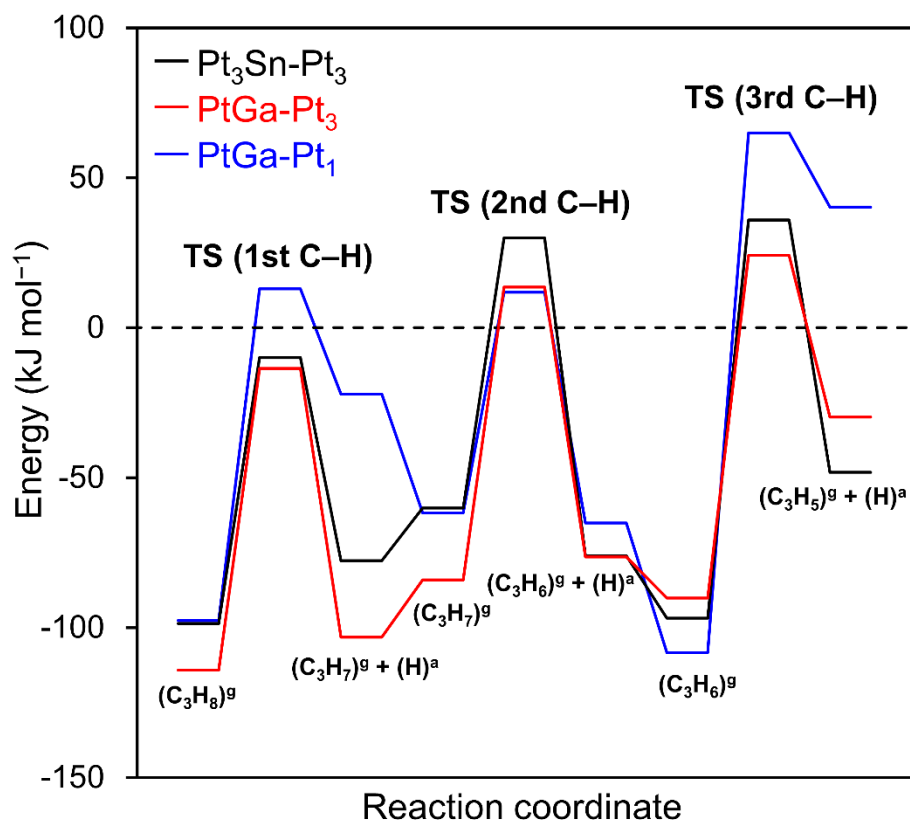

**Supplementary Figure 26.** Energy diagram for PDH on the PtGa:A(111)-Pt<sub>1</sub>, PtGa:A(111)-Pt<sub>3</sub>, and Pt<sub>3</sub>Sn(111)-Pt<sub>3</sub> sites calculated by density functional theory (DFT). The superscript “g” and “a” indicate the gaseous and adsorbed states of molecules, respectively.

**Supplementary Table 6.** Calculated activation energy ( $E_a$ ) for the dehydrogenation of propane on Pt-based surfaces.

| Surface                            | Activation energy (kJ mol <sup>-1</sup> )               |                                                         |                                                                            |                                                         |
|------------------------------------|---------------------------------------------------------|---------------------------------------------------------|----------------------------------------------------------------------------|---------------------------------------------------------|
|                                    | 1st C–H scission<br>( $E_a^{1st\ C-H}$ ) <sup>[a]</sup> | 2nd C–H scission<br>( $E_a^{2nd\ C-H}$ ) <sup>[b]</sup> | C <sub>3</sub> H <sub>6</sub> desorption<br>( $E_a^{des}$ ) <sup>[c]</sup> | 3rd C–H scission<br>( $E_a^{3rd\ C-H}$ ) <sup>[d]</sup> |
| Pt <sub>3</sub> Sn-Pt <sub>3</sub> | 100.5                                                   | 97.6                                                    | 90.1                                                                       | 114.3                                                   |
| PtGa-Pt <sub>3</sub>               | 88.7                                                    | 90.0                                                    | 96.8                                                                       | 132.7                                                   |
| PtGa-Pt <sub>1</sub>               | 110.6                                                   | 73.6                                                    | 108.3                                                                      | 173.2                                                   |

<sup>[a]</sup> Activation energy for first C–H scission ( $C_3H_8 \rightarrow C_3H_7 + H$ ). <sup>[b]</sup> Activation energy for second C–H scission ( $C_3H_7 \rightarrow C_3H_6 + H$ ). <sup>[c]</sup> Activation energy for third C–H scission ( $C_3H_6 \rightarrow C_3H_5 + H$ ). <sup>[d]</sup> Activation energy for C<sub>3</sub>H<sub>6</sub> desorption.

**Supplementary Note 11.** Estimation of C<sub>3</sub>H<sub>6</sub> selectivity on the basis of Arrhenius equation:

$$R = \frac{r_{\text{des}}}{r_{3\text{rd}}} = \frac{k_{\text{des}}\theta_{\text{C}_3\text{H}_6}}{k_{3\text{rd}}\theta_{\text{C}_3\text{H}_6}(1-\theta)} \approx \frac{v_{\text{des}}\exp\left(-\frac{\Delta E_{\text{des}}}{RT}\right)}{v_{3\text{rd}}\exp\left(-\frac{\Delta E_{3\text{rd}}}{RT}\right)} = \frac{v_{\text{des}}}{v_{3\text{rd}}}\exp\left(\frac{\Delta E}{RT}\right) \approx \exp\left(\frac{\Delta E}{RT}\right) \quad (3)$$

$$\text{C}_3\text{H}_6\text{selectivity (\%)} = \frac{r_{\text{des}}}{r_{3\text{rd}} + r_{\text{des}}} \times 100 = \frac{R}{1 + R} \times 100 \quad (4)$$

Where,  $r_x$ ,  $k_x$ ,  $\theta_x$ ,  $1-\theta$ , and  $v_x$  are reaction rate, rate constant, coverage, vacant site fraction, and preexponential factor, respectively. When C<sub>3</sub>H<sub>8</sub> conversion is sufficiently low,  $1-\theta$  can be approximated as 1. In this estimation, the two preexponential factors were considered nearly equal.

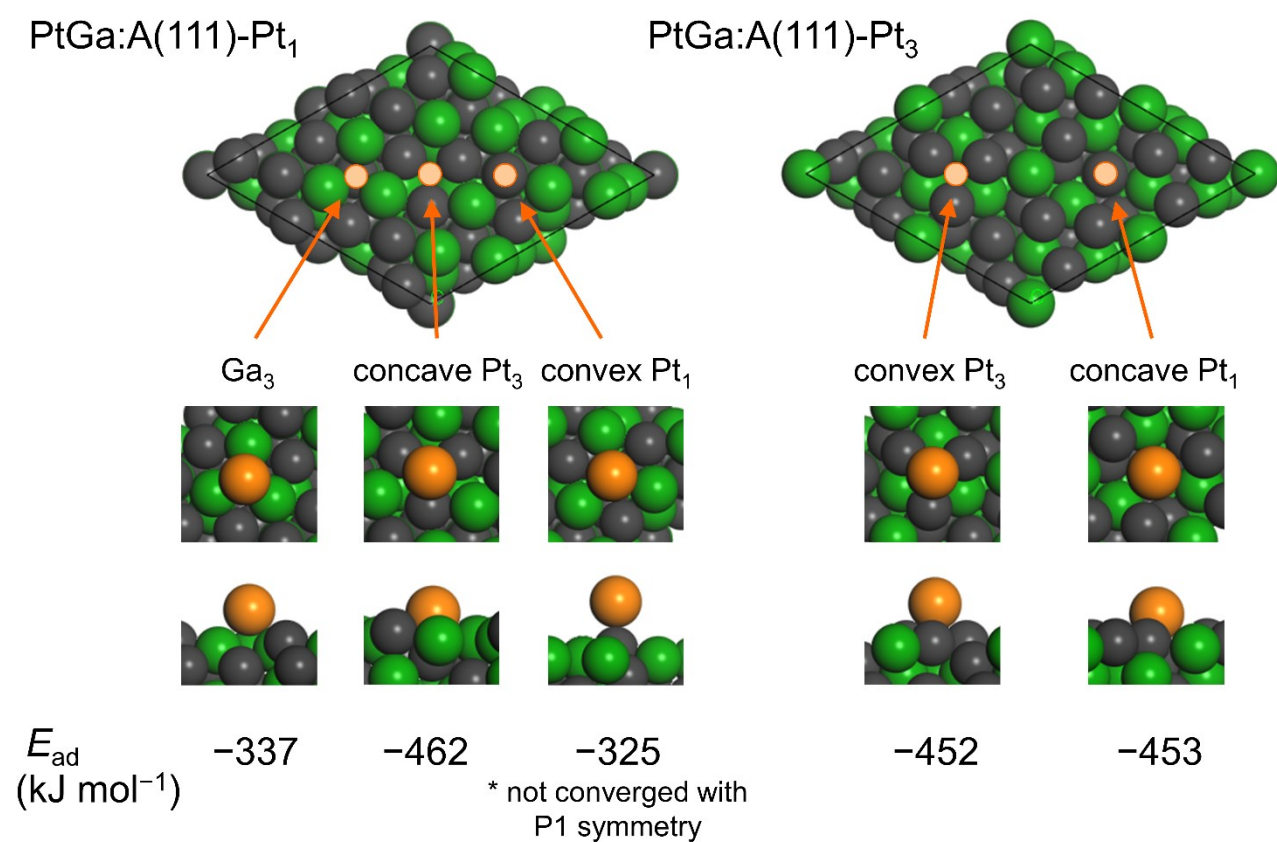

**Supplementary Figure 27.** Adsorption energy ( $E_{\text{ad}}$ ) and optimized structure of a Pb atom on various Ga<sub>3</sub>, Pt<sub>3</sub>, and Pt<sub>1</sub> sites of the two PtGa:A(111) surfaces. All calculations were done with P3 symmetry. Structure optimization for Pb on the convex Pt<sub>1</sub> site did not converge with P1 symmetry due to the complete migration of the Pb atom downward, which indicates that the convex Pt<sub>1</sub> site is actually unfavorable for Pb deposition.

## Supplementary References

1. Hsu, L. S., Guo, G. Y., Denlinger, J. D. & Allen, J. W. Experimental and theoretical study of the electronic structure of PtGa<sub>2</sub>. *Phys. Rev. B: Condens. Matter Mater. Phys.* **63**, 1551051–1551058 (2001).
2. Iihama, S., Furukawa, S. & Komatsu, T. Efficient Catalytic System for Chemoselective Hydrogenation of Halonitrobenzene to Haloaniline Using PtZn Intermetallic Compound. *ACS Catal.* **6**, 742–746 (2016).
3. Searles, K. *et al.* Highly Productive Propane Dehydrogenation Catalyst Using Silica-Supported Ga-Pt Nanoparticles Generated from Single-Sites. *J. Am. Chem. Soc.* **140**, 11674–11679 (2018).
4. Wowsnick, G. *et al.* Surface dynamics of the intermetallic catalyst Pd<sub>2</sub>Ga, Part II - Reactivity and stability in liquid-phase hydrogenation of phenylacetylene. *J. Catal.* **309**, 221–230 (2014).
5. Wowsnick, G. *et al.* Surface dynamics of the intermetallic catalyst Pd<sub>2</sub>Ga, Part i - Structural stability in UHV and different gas atmospheres. *J. Catal.* **309**, 209–220 (2014).
6. Sattler, J. J. H. B., Ruiz-Martinez, J., Santillan-Jimenez, E. & Weckhuysen, B. M. Catalytic dehydrogenation of light alkanes on metals and metal oxides. *Chem. Rev.* **114**, 10613–10653 (2014).
7. Shen, L. L. *et al.* The effects of calcination temperature of support on PtIn/Mg(Al)O catalysts for propane dehydrogenation reaction. *Chem. Eng. J.* **324**, 336–346 (2017).
8. Li, P. P. *et al.* The promotion effects of Ni on the properties of Cr/Al catalysts for propane dehydrogenation reaction. *Appl. Catal. A: Gen.* **522**, 172–179 (2016).
9. Liu, X. *et al.* Improved catalytic performance in propane dehydrogenation of PtSn/ $\gamma$ -Al<sub>2</sub>O<sub>3</sub> catalysts by doping indium. *Chem. Eng. J.* **247**, 183–192 (2014).
10. Zhu, Y. *et al.* Lattice-confined Sn (IV/II) stabilizing raft-like Pt clusters: High selectivity and durability in propane dehydrogenation. *ACS Catal.* **7**, 6973–6978 (2017).
11. Zha, S. *et al.* Identification of Pt-based catalysts for propane dehydrogenation: Via a probability analysis. *Chem. Sci.* **9**, 3925–3931 (2018).
12. Wang, T. *et al.* Effects of Ga doping on Pt/CeO<sub>2</sub>-Al<sub>2</sub>O<sub>3</sub> catalysts for propane dehydrogenation. *AIChE J.* **62**, 4365–4376 (2016).
13. Li, J. *et al.* Size effect of TS-1 supports on the catalytic performance of PtSn/TS-1 catalysts for propane dehydrogenation. *J. Catal.* **352**, 361–370 (2017).
14. Liu, G. *et al.* Platinum-Modified ZnO/Al<sub>2</sub>O<sub>3</sub> for Propane Dehydrogenation: Minimized Platinum Usage and Improved Catalytic Stability. *ACS Catal.* **6**, 2158–2162 (2016).
15. Jiang, F. *et al.* Propane Dehydrogenation over Pt/TiO<sub>2</sub>-Al<sub>2</sub>O<sub>3</sub> Catalysts. *ACS Catal.* **5**, 438–447 (2015).
16. Long, L. L. *et al.* The comparison and optimization of zirconia, alumina, and zirconia-alumina supported PtSnIn trimetallic catalysts for propane dehydrogenation reaction. *J. Ind. Eng. Chem.* **51**, 271–280 (2017).
17. Sun, G. *et al.* Breaking the scaling relationship via thermally stable Pt/Cu single atom alloys for catalytic dehydrogenation. *Nat. Commun.* **9**, 4454 (2018).
18. Nawaz, Z., Tang, X., Chu, Y. & Wei, F. Influence of calcination temperature and reaction atmosphere on the catalytic properties of Pt-Sn/SAPO-34 for propane dehydrogenation. *Chin. J. Catal.* **31**, 552–556 (2010).
19. Shi, L. *et al.* Al<sub>2</sub>O<sub>3</sub> Nanosheets Rich in Pentacoordinate Al<sup>3+</sup> Ions Stabilize Pt-Sn Clusters for Propane Dehydrogenation. *Angew. Chem. Int. Ed.* **54**, 13994–13998 (2015).
20. Duan, Y., Zhou, Y., Zhang, Y., Sheng, X. & Xue, M. Effect of sodium addition to PtSn/AlSBA-15 on the catalytic properties in propane dehydrogenation. *Catal. Letters* **141**, 120–127 (2011).
21. Zhang, Y., Zhou, Y., Huang, L., Xue, M. & Zhang, S. Sn-modified ZSM-5 As support for platinum catalyst in propane dehydrogenation. *Ind. Eng. Chem. Res.* **50**, 7896–7902 (2011).

22. Zhang, Y. *et al.* Structure and catalytic properties of the Zn-modified ZSM-5 supported platinum catalyst for propane dehydrogenation. *Chem. Eng. J.* **270**, 352–361 (2015).
23. Zhang, Y. *et al.* Comparative study of bimetallic Pt-Sn catalysts supported on different supports for propane dehydrogenation. *J. Mol. Catal. A Chem.* **381**, 138–147 (2014).
24. Fan, X. *et al.* Dehydrogenation of propane over PtSnAl/SBA-15 catalysts: Al addition effect and coke formation analysis. *Catal. Sci. Technol.* **5**, 339–350 (2015).
25. Ren, G. Q. *et al.* Effect of group IB metals on the dehydrogenation of propane to propylene over anti-sintering Pt/MgAl<sub>2</sub>O<sub>4</sub>. *J. Catal.* **366**, 115–126 (2018).
26. Zhu, H. *et al.* Sn surface-enriched Pt-Sn bimetallic nanoparticles as a selective and stable catalyst for propane dehydrogenation. *J. Catal.* **320**, 52–62 (2014).
27. Li, B., Xu, Z., Chu, W., Luo, S. & Jing, F. Ordered mesoporous Sn-SBA-15 as support for Pt catalyst with enhanced performance in propane dehydrogenation. *Chin. J. Catal.* **38**, 726–735 (2017).
28. Shan, Y. L., Wang, T., Sui, Z. J., Zhu, Y. A. & Zhou, X. G. Hierarchical MgAl<sub>2</sub>O<sub>4</sub> supported Pt-Sn as a highly thermostable catalyst for propane dehydrogenation. *Catal. Commun.* **84**, 85–88 (2016).
29. Rochlitz, L. *et al.* Silica-supported, narrowly distributed, subnanometric Pt–Zn particles from single sites with high propane dehydrogenation performance. *Chem. Sci.* **11**, 1549–1555 (2020).
30. Sun, C. *et al.* A comparative study on different regeneration processes of Pt-Sn/ $\gamma$ -Al<sub>2</sub>O<sub>3</sub> catalysts for propane dehydrogenation. *J. Energy Chem.* **27**, 311–318 (2018).
31. Waku, T., Biscardi, J. A. & Iglesia, E. Active, selective, and stable Pt/Na-[Fe]ZSM5 catalyst for the dehydrogenation of light alkanes. *Chem. Commun.* **3**, 1764–1765 (2003).
32. Tripathi, S. N. & Chandrasekharaiah, M. S. Thermodynamic properties of binary alloys of platinum metals II: Ir-Pt system. *J. Less-Common Met.* **91**, 251–260 (1983).
33. Ellner, M. Zusammenhang zwischen strukturellen und thermodynamischen eigenschaften bei phasen der Cu-Familie in den T10-B3-systemen. *J. Less-Common Met.* **60**, 15–39 (1978).
34. Massara, R. Le syst me binaire Pt-Sn. *J. Alloys Compd.* **215**, 175–179 (1994).
35. Lin, C. F., Mohney, S. E. & Y. A. Chang. Phase equilibria in the Pt-In-P. *J. Appl. Phys.* **74**, 4398–4402 (1993).
36. Ellner, M. Zusammenhang zwischen strukturellen und thermo-dynamischen eigenschaften bei phasen der kupferfamilie in T<sup>10</sup>-B<sup>4</sup>-systemen. *J. Less-Common Met.* **78**, 21–32 (1981).
37. Sattler, J. J. H. B. *et al.* Platinum-promoted Ga/Al<sub>2</sub>O<sub>3</sub> as highly active, selective, and stable catalyst for the dehydrogenation of propane. *Angew. Chem. Int. Ed.* **53**, 9251–9256 (2014).
38. Im, J. & Choi, M. Physicochemical Stabilization of Pt against Sintering for a Dehydrogenation Catalyst with High Activity, Selectivity, and Durability. *ACS Catal.* **6**, 2819–2826 (2016).
39. Xu, Y. *et al.* Sintering-Resistant Pt on Ga<sub>2</sub>O<sub>3</sub> Rods for Propane Dehydrogenation: The Morphology Matters. *Ind. Eng. Chem. Res.* **57**, 13087–13093 (2018).
40. Gao, H. DFT study of the adsorption properties of single Pt, Pd, Ag, in and Sn on the  $\gamma$ -Al<sub>2</sub>O<sub>3</sub> (110) surface. *Chem. Phys. Lett.* **657**, 11–17 (2016).
41. Jablonski, E. L., Castro, A. A., Scelza, O. A. & De Miguel, S. R. Effect of Ga addition to Pt/Al<sub>2</sub>O<sub>3</sub> on the activity, selectivity and deactivation in the propane dehydrogenation. *Appl. Catal. A: Gen.* **183**, 189–198 (1999).
42. Siddiqi, G., Sun, P., Galvita, V. & Bell, A. T. Catalyst performance of novel Pt/Mg(Ga)(Al)O catalysts for alkane dehydrogenation. *J. Catal.* **274**, 200–206 (2010).
